# Supplementary material for: The MEK inhibitor selumetinib complements CTLA-4 blockade by reprogramming the tumor immune microenvironment
Source: J Immunother Cancer. 2017 Aug 15;5:63. doi: 10.1186/s40425-017-0268-8 (PMC5557252; doi:10.1186/s40425-017-0268-8)
Supplement: Supplementary file 1 — Table S1. Gene expression analysis of selumetinib treated CT26 tumors (24 h) by Nanostring’s nCounter system. Table S2. Target genes selected for qRT-PCR analysis. Table S3. Relative tumor gene expression levels post-treatment versus control after 1 day. Table S4. Relative tumor gene expression levels post-treatment versus control after 8 days. Table S5A. Effect of combination treatment on transcript levels versus anti-CTLA4 (Day 1 post-treatment). Table S5B. Effect of combination treatment on transcript levels versus anti-CTLA4 (Day 8 post-treatment). (XLSX 107 kb) [file 40425_2017_268_MOESM1_ESM.xlsx]

## Sheet: S1_nanostring
Table S1. Gene expression analysis of selumetinib treated CT26 tumors (24 hours) by Nanostring's nCounter system.
Gene Symbol	AZD6244 Versus Saline Log2 FoldChange	AZD6244 Versus Saline Linear FoldChange	AZD6244 Versus Saline Raw Pvalue	AZD6244 Versus Saline FDR Pvalue	AZD6244 Versus Saline Detection Call	Saline.x7 Log2 Expression Full Nanostring Data	Saline.x11 Log2 Expression Full Nanostring Data	Saline.x71 Log2 Expression Full Nanostring Data	Saline.x4 Log2 Expression Full Nanostring Data	Saline.x5 Log2 Expression Full Nanostring Data	Saline.x31 Log2 Expression Full Nanostring Data	AZD6244.x16 Log2 Expression Full Nanostring Data	AZD6244.x58 Log2 Expression Full Nanostring Data	AZD6244.x65 Log2 Expression Full Nanostring Data	AZD6244.x49 Log2 Expression Full Nanostring Data	AZD6244.x50 Log2 Expression Full Nanostring Data	AZD6244.x61 Log2 Expression Full Nanostring Data
Ccr8	4.77833	27.4424	0.00824218	0.27447	UNDETECTED	6.81	-0.33	-0.33	-0.33	-0.33	-0.33	3.51	6.88	7.2	5.08	7.01	4.15
Sele	-1.91833	-3.77986	0.000471815	0.122511	DETECTED	13.14	12.61	13.25	13.32	12.67	12.06	11.69	11.61	9.77	11.04	10.48	10.95
Il1b	-1.81833	-3.52674	0.000941722	0.128781	DETECTED	11.69	10.75	12.66	11.31	10.54	11.4	10.23	9.47	9.48	9.45	9.03	9.78
Ccl12	-1.08	-2.11404	0.00253248	0.205123	DETECTED	13.43	13.96	14.41	14.42	13.93	13.57	13.23	13.31	13.13	13.01	12.58	11.98
Il1r2	-1.04333	-2.06098	0.00329517	0.205123	DETECTED	8.52	8.32	9.56	8.75	9.3	9.47	8.69	7.7	7.74	7.86	7.95	7.72
Ptgs2	-1.585	-3.00008	0.00480508	0.262838	DETECTED	13	12.97	14.02	13.84	12.64	12.59	11.97	11.98	10.16	11.22	11.56	12.66
Il23a	-1.705	-3.26029	0.00618612	0.27447	UNDETECTED	3.67	4.26	5.07	4.03	4.6	3.95	3.51	2.24	4	1.83	1.48	2.29
Ccl24	-1.11667	-2.16845	0.0063081	0.27447	DETECTED	7.9	7.33	8.18	8.68	7.32	8.12	6.65	7.66	7.13	6.34	7.03	6.02
Ppbp	-1.43167	-2.69758	0.00691021	0.27447	UNDETECTED	7.33	7.16	8.1	7.46	6.88	7.47	6.25	6.67	5.47	4.57	6.86	5.99
Rag2	-1.025	-2.03496	0.00903192	0.27447	UNDETECTED	4.53	3.85	3.75	4.33	3.94	5.02	3.09	3.68	3.67	2.41	2.62	3.8
Mme	-2.23833	-4.71852	0.0142718	0.388243	UNDETECTED	5.23	5.53	6.8	4.33	3.94	4.5	2.09	2.24	4.01	1.11	5.16	2.29
Csf2	-1.275	-2.41999	0.0225622	0.431526	DETECTED	7.96	6.86	8.54	7.91	7.79	7.46	7.38	7.32	6.85	5.48	6.73	5.11
C8b	-1.27833	-2.42559	0.0295739	0.452632	UNDETECTED	6.01	6.86	5.05	5.99	6.38	5.24	4.27	4.82	4.65	2.95	5.87	5.3
Il3	-1.96833	-3.91316	0.0354515	0.473155	UNDETECTED	4.9	5.77	5.34	4.01	5.17	5.02	4.61	3.67	4.01	-0.03	3.85	2.29
Tgfb2	-1.30333	-2.46798	0.0370057	0.473155	UNDETECTED	6.93	5.98	6.01	4.86	6.23	6.23	4.61	5.3	5.64	4.49	5.64	2.74
Vtn	-1.44333	-2.71948	0.0461898	0.510364	UNDETECTED	5.23	2.91	3.75	3.69	5.43	4.5	3.9	3.35	4	2.89	1.48	1.23
Cxcr2	-2.25	-4.75683	0.0466512	0.510364	UNDETECTED	6.68	2.35	8.22	4.31	6.23	6.9	3.9	3.67	2.94	4.12	3.84	2.72
Tfrc	-0.283333	-1.217	0.000604358	0.122511	DETECTED	12.78	12.79	12.81	12.67	12.6	12.91	12.55	12.37	12.5	12.47	12.49	12.48
Irf3	-0.638333	-1.55653	0.000671908	0.122511	DETECTED	7.9	8.28	8.25	8.31	8.41	8.18	7.81	7.6	7.59	7.16	7.48	7.86
Cd81	0.21	1.15669	0.00199017	0.205123	DETECTED	15.03	14.88	14.92	14.95	14.82	14.85	15.01	15.1	15.05	15.09	15.19	15.27
Mapk11	-0.765	-1.69937	0.00332966	0.205123	DETECTED	11.37	11.35	12.05	11.38	11.93	12.2	11.25	10.92	11.2	10.87	10.52	10.93
Ccl7	-0.93	-1.90528	0.00337497	0.205123	DETECTED	12.35	12.49	13.18	12.61	12.97	13.26	12.11	12.04	12.36	11.74	11.05	11.98
Ccl2	-0.86	-1.81504	0.00805397	0.27447	DETECTED	14.52	14.56	15.34	14.44	15.27	15.4	14.39	13.96	14.64	14.01	13.33	14.04
Cd79a	-0.983333	-1.97703	0.0087735	0.27447	UNDETECTED	5.52	4.96	4.76	5.82	4.89	4.76	4.27	4.56	4.63	3.35	4.54	3.46
Itga6	-0.556667	-1.47087	0.00887178	0.27447	DETECTED	14.22	13.96	14.23	14.22	13.93	13.82	13.84	13.88	13.23	13.01	13.44	13.64
Plau	-0.658333	-1.57826	0.0118631	0.341532	DETECTED	13.36	13.51	14.02	13.78	13.66	13.64	13.28	13.25	13.3	12.91	12.17	13.11
Cd80	-0.306667	-1.23685	0.0149051	0.388243	DETECTED	10.9	10.98	11.05	11.06	10.89	11.13	10.84	10.78	10.9	10.73	10.61	10.31
Tigit	-0.431667	-1.34879	0.0162729	0.404603	DETECTED	10.05	9.74	10.08	9.92	10	10.5	9.78	9.49	10.07	9.4	9.38	9.58
Nt5e	-0.536667	-1.45062	0.0174276	0.414473	DETECTED	10.59	9.63	10.11	10.04	9.56	10.01	9.84	9.64	9.25	9.48	9.35	9.16
Ceacam1	-0.703333	-1.62826	0.0197786	0.431526	DETECTED	11.24	10.56	11.26	11.32	10.47	10.45	10.57	10.81	9.88	9.72	10.3	9.8
Il17ra	-0.551667	-1.46578	0.0205802	0.431526	DETECTED	10.91	11.12	11.01	11.12	11.22	11.26	10.84	10.69	11.09	9.91	10.43	10.37
Atg16l1	-0.248333	-1.18783	0.0207664	0.431526	DETECTED	11.74	11.73	11.87	11.58	11.65	11.76	11.63	11.61	11.58	11.18	11.53	11.31
Runx1	-0.62	-1.53688	0.0217332	0.431526	DETECTED	13.32	13.3	13.17	13.44	13	13.15	13.01	12.99	12.57	11.9	12.21	12.98
Pdgfb	-0.286667	-1.21982	0.022878	0.431526	DETECTED	10.98	10.75	10.95	10.5	10.91	10.9	10.41	10.74	10.55	10.24	10.67	10.66
Mr1	-0.72	-1.64718	0.026025	0.452632	DETECTED	8.76	8.99	8.51	8.7	8.84	9.31	7.86	8.09	8.73	7.86	8.87	7.38
Tlr4	-0.318333	-1.24689	0.0261887	0.452632	DETECTED	12.26	12.11	12.28	12.04	12.02	12.53	11.93	11.99	12.12	12.03	11.77	11.49
Itgb1	-0.22	-1.16473	0.0266574	0.452632	DETECTED	16.07	15.97	16.09	16.18	16.04	15.92	15.92	16.04	15.88	15.75	15.83	15.53
Tgfb1	-0.181667	-1.13419	0.0275815	0.452632	DETECTED	13.36	13.28	13.31	13.22	13.33	13.45	13.1	13.29	13.35	13.09	12.98	13.05
Ncam1	-0.696667	-1.62076	0.0284401	0.452632	DETECTED	7.5	7.91	8.6	7.27	7.99	7.51	7.31	6.94	6.39	6.9	7.75	7.31
Cd69	-0.755	-1.68763	0.0297893	0.452632	DETECTED	7.33	7.68	7.98	7.05	7.6	8.44	6.97	6.76	7.62	6.89	7.29	6.02
Bcap31	0.141667	1.10318	0.0309101	0.456968	DETECTED	13.74	13.71	13.91	13.85	13.85	13.79	13.86	13.94	13.81	14.06	13.93	14.1
Lilra6	-0.998333	-1.99769	0.0334338	0.473155	UNDETECTED	5.53	6.48	6.78	7.05	7.17	6.77	6.98	5.29	6.19	5.14	5.12	5.07
Il1r1	-0.253333	-1.19196	0.0355688	0.473155	DETECTED	12.61	12.39	12.47	12.67	12.36	12.34	12.23	12.43	12.26	12.04	11.92	12.44
Tollip	-0.218333	-1.16339	0.03682	0.473155	DETECTED	12.65	12.52	12.85	12.62	12.61	12.64	12.55	12.51	12.29	12.23	12.3	12.7
Chuk	-0.245	-1.18509	0.037195	0.473155	DETECTED	12.19	12.09	12.17	12.26	12.1	12.35	11.87	12.09	11.98	11.63	11.87	12.25
Gpr183	-0.583333	-1.49831	0.0402295	0.499951	DETECTED	8.79	8.48	8.99	9.02	8.48	8.28	8.22	8.27	8.83	7.71	8.14	7.37
Abcf1	-0.256667	-1.19472	0.0424941	0.499951	DETECTED	11.63	11.57	11.79	11.75	11.68	11.63	11.5	11.61	11.41	11.01	11.33	11.65
Il6	-0.765	-1.69937	0.0427889	0.499951	DETECTED	7.57	6.86	8.88	7.58	7.73	8.12	7.15	7.03	6.25	7.21	7.12	7.39
Tirap	-0.42	-1.33793	0.0429574	0.499951	DETECTED	10.44	10.55	10.45	10.57	10.45	10.71	10.11	10.31	10.15	9.38	10.2	10.5
Il1rl1	-0.466667	-1.38191	0.046051	0.510364	DETECTED	14.05	13.51	14.37	13.46	13.89	13.5	13.63	13.23	12.78	13.5	13.17	13.67
Hif1a	-0.251667	-1.19058	0.0491458	0.527113	DETECTED	13.99	13.8	14.11	13.87	13.9	14.11	13.85	13.93	13.95	13.4	13.63	13.51
Masp2	1.14833	2.21658	0.0934097	0.615604	UNDETECTED	4.13	1.74	1.74	1.74	1.74	1.74	1.74	4.83	2.51	4.08	3.86	2.7
Gzma	1.005	2.00694	0.0951522	0.619622	DETECTED	12.59	12.59	11.78	10.02	12.98	12.9	13.1	12.48	13.8	13.68	12.24	13.59
H2-Eb1	1.03167	2.04438	0.216225	0.78328	DETECTED	13.95	13.31	12.63	10.17	13.72	15.13	14.13	13.34	14.93	14.34	13.17	15.19
Cd59b	1.00167	2.00231	0.242509	0.807915	UNDETECTED	4.9	3.85	1.9	4.63	1.02	4.5	3.9	6.34	4.9	4.75	3.47	3.45
Cxcl9	1.025	2.03496	0.284142	0.819342	DETECTED	13.96	13.8	13.47	9.57	14.63	15.49	14.72	13.96	15.37	14.72	13.8	14.5
Cxcl3	-1.68833	-3.22284	0.0572659	0.551109	UNDETECTED	6.68	4.63	8.38	6.16	5.87	3.93	5.21	5.71	4.35	2.94	3.83	3.48
Ccl26	-1.625	-3.08442	0.062843	0.551567	UNDETECTED	3.67	2.91	4.45	4.03	4.6	4.51	3.9	1.24	3.66	-0.05	3.86	1.81
Il28a	-1.295	-2.45377	0.0691012	0.569224	UNDETECTED	2.59	3.85	4.77	4.03	5.17	2.66	0.44	3.35	2.04	3.32	3.07	3.08
Trem1	-1.62667	-3.08799	0.0761676	0.570735	UNDETECTED	8.11	5.53	8.37	7.88	5.86	4.99	7.24	6.33	4.37	3.81	4.17	5.06
Cxcl1	-1.22833	-2.34296	0.102863	0.639387	DETECTED	10.65	8.74	12.49	9.45	8.57	9.28	9.48	8.5	8.31	8.57	7.91	9.04
Tnfsf18	-1.475	-2.77984	0.109043	0.649324	UNDETECTED	6.93	5.77	5.32	6.3	6.23	7.09	6.25	5.07	2.08	4.81	7.09	3.49
Il17b	-1.26833	-2.40883	0.113617	0.650933	UNDETECTED	6.81	4.96	5.33	4.31	6.06	4.75	4.92	2.23	2.53	3.75	5.66	5.52
Aicda	-1.11667	-2.16845	0.117707	0.656999	UNDETECTED	6	4.63	3.36	3.68	5.87	4.5	3.9	2.64	5.4	2.9	4.21	2.29
Cr2	-1.08333	-2.11893	0.12905	0.672287	UNDETECTED	4.13	5.26	3.36	5.18	2.3	3.65	4.61	3.99	2.04	1.83	2.62	2.29
Cxcr1	-1.41667	-2.66968	0.136993	0.683644	UNDETECTED	6.93	6.86	7.66	7.23	3.58	6.65	6.66	5.06	2.55	4.17	6.66	5.31
Hc	-1.1	-2.14355	0.161174	0.739644	UNDETECTED	4.53	5.53	3.75	4.33	3.58	5.7	4.61	1.24	3.32	2.42	5.43	3.8
Ifna2	-1.11167	-2.16095	0.169439	0.753519	UNDETECTED	4.13	2.91	3.75	4.92	3.2	4.23	2.09	4.56	3.31	-0.05	3.86	2.7
Frmpd4	-1.01	-2.01391	0.229615	0.789934	UNDETECTED	1.87	0.6	3.37	4.04	3.58	1.84	-0.06	1.25	3.3	-0.06	2.12	2.69
Cd19	-1.01667	-2.02324	0.242865	0.807915	UNDETECTED	4.9	6.62	4.1	5.38	5.65	6.54	4.92	5.89	5.63	2.94	5.87	1.84
C4bp	-1.03667	-2.05148	0.26625	0.819342	UNDETECTED	4.53	2.35	3.36	5.17	3.94	6.8	2.62	3.68	5.16	1.11	2.62	4.74
Cd28	0.613333	1.52979	0.0529361	0.548186	DETECTED	7.05	6.86	5.99	6.47	7.32	7.31	7.31	6.77	8.02	7.84	7.37	7.37
Plaur	-0.771667	-1.70724	0.0531149	0.548186	DETECTED	13.39	13.37	13.8	13.96	13.23	13.07	12.88	13.02	11.68	12.7	12.11	13.8
Ptpn2	-0.146667	-1.10701	0.0544797	0.551109	DETECTED	11.89	11.75	12.09	11.92	11.91	11.98	11.92	11.73	11.75	11.59	11.77	11.9
Pou2f2	-0.495	-1.40932	0.0571306	0.551109	DETECTED	10.73	10.93	10.66	10.53	11.11	11.7	10.58	10.38	11.04	9.9	10.33	10.46
Lilra5	-0.816667	-1.76133	0.0576567	0.551109	DETECTED	9.54	9.28	8.48	9.07	8.44	7.89	8.18	8.01	7.99	8.14	8.8	6.68
Prdm1	-0.76	-1.69349	0.058973	0.551109	DETECTED	9.3	8.58	9.39	8.92	8.89	9.51	9.19	8.39	8.11	7.04	8.38	8.92
Ifitm1	0.335	1.26138	0.0594432	0.551109	DETECTED	13.54	13.01	13.58	12.94	13.14	13.28	13.54	13.38	13.36	14.08	13.42	13.72
Cd86	-0.483333	-1.39797	0.0624418	0.551567	DETECTED	10.67	10.53	10.66	10.23	10.65	11.15	10.56	10.37	10.7	9.96	9.95	9.45
Ilf3	-0.266667	-1.20303	0.0626155	0.551567	DETECTED	11.33	11.2	11.23	11.39	11.2	11.11	11.13	11.32	11.1	10.56	10.97	10.78
Il1rap	-0.29	-1.22264	0.0639282	0.551567	DETECTED	10.03	10.34	10.39	10.83	10.35	10.24	10.15	10.33	10.17	9.75	10.16	9.88
Cd109	-0.331667	-1.25847	0.0645344	0.551567	DETECTED	12.6	12.23	12.5	12.88	12.34	12.47	12.38	12.44	12.34	11.79	12.33	11.75
Blnk	-0.195	-1.14472	0.0706513	0.569224	DETECTED	11.14	11.11	10.99	11.15	11.14	11.2	10.83	10.76	11.02	10.89	11.3	10.76
Tnfsf14	-0.856667	-1.81085	0.0728639	0.569224	DETECTED	7.33	7.68	7.5	6.7	7.89	7.94	7.23	7.03	7.72	6.75	5.81	5.36
Ptpn22	-0.403333	-1.32256	0.0732117	0.569224	DETECTED	12.69	12.31	12.65	12.73	11.85	12.1	12.15	12.48	11.77	11.88	11.52	12.11
Cd83	-0.365	-1.28788	0.0733328	0.569224	DETECTED	11.68	11.49	11.62	11.32	11.77	12.21	11.44	11.26	11.65	11.58	11.23	10.74
Bcl6	-0.331667	-1.25847	0.0747846	0.569224	DETECTED	10.12	10	10.33	10.37	9.87	10.37	9.99	10.05	9.82	9.18	9.95	10.08
Zeb1	-0.333333	-1.25992	0.0748912	0.569224	DETECTED	12.34	12.19	12.22	12.38	12.23	12.02	12.05	12.32	12.01	11.28	12.02	11.7
Tgfbr1	-0.238333	-1.17963	0.0749253	0.569224	DETECTED	12.27	12.32	11.83	12.05	12.2	12.45	11.97	12.05	12.23	11.66	11.82	11.96
Litaf	-0.273333	-1.2086	0.0794357	0.580612	DETECTED	11.85	11.78	11.88	11.76	11.97	12.06	11.76	11.82	11.89	11.49	11.63	11.07
Cdh5	-0.431667	-1.34879	0.0796086	0.580612	DETECTED	11.39	11.14	11.35	11.47	10.84	11.2	10.74	11.38	10.98	10.09	11.13	10.48
Lif	-0.685	-1.6077	0.0846156	0.604202	DETECTED	9.49	9.6	10.15	10.24	9.68	9.68	9.72	9.44	8.82	7.91	8.81	10.03
Cd99	0.751667	1.68374	0.0850522	0.604202	DETECTED	11.61	11.7	12.09	11.83	11.56	11.78	11.86	12.14	11.81	12.68	12.47	14.12
Il33	-0.348333	-1.27309	0.086488	0.606525	DETECTED	10.9	11.17	11.8	11.16	11.65	11.51	11.24	11.32	11.27	10.8	10.71	10.76
Cdkn1a	-0.255	-1.19334	0.0876737	0.607057	DETECTED	12.85	12.98	13.26	13.16	12.81	12.77	12.8	12.75	12.3	12.57	12.81	13.07
Ccl25	-0.5	-1.41421	0.0891547	0.609595	DETECTED	8.89	9.15	9.05	9.57	9.43	9.29	9	8.96	7.93	8.21	9.48	8.8
Cfh	-0.588333	-1.50351	0.0907097	0.612571	DETECTED	10.83	11.06	10.65	10.65	11	11.46	10.58	10.75	10.91	10.07	10.69	9.12
Clu	-0.328333	-1.25556	0.0923454	0.615604	DETECTED	12.08	11.81	12.81	11.97	12.02	11.88	11.61	11.86	11.73	11.88	12.06	11.46
Itga5	-0.363333	-1.28639	0.101811	0.639387	DETECTED	11.06	11.06	11.43	11.24	11.13	11.19	10.9	11.18	10.91	10.09	10.56	11.29
Ebi3	-0.631667	-1.54935	0.102056	0.639387	DETECTED	9.81	9.94	9.55	9.48	9.97	10.8	9.53	9.33	10.08	9.49	9.36	7.97
Pecam1	-0.426667	-1.34412	0.102324	0.639387	DETECTED	13.15	12.81	13.18	12.85	13.06	13.34	12.71	13	12.97	12.46	13	11.69
Cd164	-0.115	-1.08298	0.105715	0.646879	DETECTED	14.09	14.17	14.16	14.07	14.2	14.23	14.08	14.21	14.16	13.84	13.99	13.95
Xbp1	0.0816667	1.05824	0.106433	0.646879	DETECTED	13.35	13.36	13.48	13.3	13.48	13.34	13.43	13.49	13.34	13.58	13.52	13.44
Ahr	-0.526667	-1.4406	0.109444	0.649324	DETECTED	12.92	12.08	12.93	12.51	12.03	12.11	12.48	12.19	11.67	10.94	11.68	12.46
Ly96	-0.3	-1.23114	0.110397	0.649324	DETECTED	10.48	10.45	10.85	10.43	10.71	10.95	10.49	10.54	10.34	10.36	10.66	9.68
Icam2	-0.336667	-1.26284	0.114261	0.650933	DETECTED	10.22	10.55	10.38	10.06	10.63	10.67	9.94	10.28	10.41	10.09	10.41	9.36
Psmb10	0.693333	1.61702	0.114933	0.650933	DETECTED	12.22	12.07	11.79	10.62	12.64	13.05	12.6	12.13	13.14	12.84	12.43	13.41
Csf1	-0.346667	-1.27162	0.115431	0.650933	DETECTED	13.38	13.79	13.89	13.47	13.78	13.94	13.59	13.73	13.76	12.67	13.13	13.29
Abcb1a	-0.548333	-1.4624	0.122901	0.667729	DETECTED	12.84	12.45	12.87	13.24	12.07	11.84	12.41	12.83	11.58	11.67	12.27	11.26
Cebpb	-0.23	-1.17283	0.124672	0.667729	DETECTED	14.04	13.84	14.46	13.83	13.92	13.9	13.83	13.84	13.63	13.49	13.65	14.17
Tnfaip3	-0.441667	-1.35817	0.125333	0.667729	DETECTED	11.32	11.13	12.03	10.7	11.22	11.76	11.39	10.8	11.33	10.24	10.65	11.1
Fkbp5	0.698333	1.62263	0.125436	0.667729	DETECTED	10.64	10.72	10.83	11.03	10.98	10.99	11.32	11.37	11.38	10.69	11.24	13.38
Bcl3	-0.471667	-1.38671	0.125733	0.667729	DETECTED	9.26	9.28	9.75	8.96	9.61	9.85	9.63	9.26	9.32	7.95	8.85	8.87
Pla2g2e	-0.956667	-1.94082	0.12809	0.672287	DETECTED	7.33	7.06	7.09	8.32	7.25	7.23	5.69	7.45	6.22	4.59	8.12	6.47
Stat6	-0.161667	-1.11858	0.130355	0.672681	DETECTED	13.15	12.88	12.93	13.03	12.96	13.13	13.01	12.95	12.98	12.45	12.86	12.86
Cd53	-0.681667	-1.60399	0.132903	0.678614	DETECTED	8.48	8.61	8.51	7.94	8.7	9.55	9.09	8.3	8.57	6.87	7.16	7.71
Tnfaip6	-0.618333	-1.5351	0.133986	0.678614	DETECTED	9.53	8.99	11.03	10.16	9.29	9.76	9.61	9.92	8.58	8.86	8.59	9.49
Npc1	-0.245	-1.18509	0.137479	0.683644	DETECTED	12.23	11.99	12.07	12.01	12	12.31	11.93	12	12.09	11.21	11.85	12.06
Traf6	-0.206667	-1.15402	0.140215	0.685683	DETECTED	11.41	11.37	11.31	11.25	11.23	11.29	11.36	11.33	11.23	10.59	11.12	10.99
Cfi	0.768333	1.7033	0.140396	0.685683	UNDETECTED	3.17	3.41	5.06	2.95	3.2	4.5	4.61	4.28	3.32	4.1	4.87	5.72
Cd82	0.178333	1.13158	0.143455	0.694422	DETECTED	12.65	12.35	12.32	12.39	12.57	12.72	12.64	12.82	13.02	12.5	12.43	12.66
Ifngr2	-0.131667	-1.09556	0.150489	0.722082	DETECTED	12.11	12.25	12.36	12.02	12.35	12.48	12.22	12.18	12.28	12.05	12.04	12.01
Nfatc3	-0.455	-1.37078	0.15653	0.736989	DETECTED	11.25	11.32	11.27	11.45	11.44	11.5	11.44	11.39	11.37	9.72	10.95	10.63
Clec5a	-0.581667	-1.49658	0.158443	0.736989	DETECTED	10.96	11.3	11.09	11.1	11.35	11.31	11.21	10.96	11.49	10.44	10.44	9.08
Cd36	-0.611667	-1.52802	0.158643	0.736989	DETECTED	12.16	13.07	12.75	11.09	12.91	13.14	12.03	11.3	12.79	11.63	12.33	11.37
Lilrb4	-0.491667	-1.40607	0.158985	0.736989	DETECTED	13.38	13.42	13.59	13.13	13.6	13.97	13.51	13.09	13.63	13.44	12.71	11.76
Clec4e	-0.69	-1.61328	0.16281	0.739644	DETECTED	8.7	8.11	9.76	8.24	9.24	9.82	9.4	7.59	9.32	7.67	7.85	7.9
Ccl4	-0.766667	-1.70133	0.163614	0.739644	DETECTED	9.36	8.29	9.45	8.19	9.04	10.83	9.15	8.12	9.27	7.53	7.56	8.93
Btla	-0.585	-1.50004	0.168815	0.753519	DETECTED	8.66	8.58	8.28	7.65	9.32	9.9	8.22	8.05	9.06	8.09	8.09	7.37
Msr1	-0.373333	-1.29534	0.171051	0.754557	DETECTED	13.49	13.5	13.47	13.18	13.6	13.64	13.5	13.42	13.68	13.22	12.51	12.31
Fcer1a	0.416667	1.33484	0.173507	0.759268	DETECTED	9.3	9.38	8.37	8.94	9.64	9.59	10.33	9.36	9.88	9.58	9.74	8.83
Il18rap	-0.203333	-1.15136	0.175005	0.759745	DETECTED	12.48	12.01	12.39	12.24	12.15	12.14	12.25	12.04	11.83	11.91	11.69	12.47
Cfp	-0.408333	-1.32715	0.177015	0.76242	DETECTED	12.73	12.92	12.88	12.72	13.24	13.42	12.79	12.71	13.19	12.86	12.47	11.44
Il4ra	-0.246667	-1.18646	0.180461	0.771188	DETECTED	12.88	13.07	13.22	12.83	13.09	13.13	13.04	13.25	13.08	12.41	12.53	12.43
Tnfrsf9	-0.45	-1.36604	0.18708	0.771585	DETECTED	10.09	8.68	10.31	9.15	9.42	9.47	9.59	8.8	8.66	8.77	8.8	9.8
Il20	-0.96	-1.94531	0.188719	0.771585	UNDETECTED	5.78	5.53	6.02	3.67	3.94	5.01	2.09	3.35	5.81	4.45	3.46	5.03
B2m	0.276667	1.21139	0.189155	0.771585	DETECTED	18.83	18.63	18.56	17.86	18.77	19	18.83	18.5	19.09	19.16	18.68	19.05
Ccl8	0.59	1.50525	0.190439	0.771585	DETECTED	15.22	15.31	15.06	13.43	15.5	16.2	15.83	15.5	16.26	15.89	15.18	15.6
Map4k4	-0.328333	-1.25556	0.190636	0.771585	DETECTED	12.98	12.9	12.99	13.04	12.74	12.64	12.72	13.12	12.6	11.7	12.22	12.96
Nod2	-0.581667	-1.49658	0.191263	0.771585	DETECTED	7.42	7.55	7.26	6.47	7.32	8.61	6.87	6.56	7.78	6.48	5.81	7.64
Prim1	-0.151667	-1.11085	0.192258	0.771585	DETECTED	12.33	12.12	12.31	12.56	12.31	12.03	12	12.16	12.19	12.34	12.25	11.81
Tnfrsf11a	-0.541667	-1.45565	0.193364	0.771585	DETECTED	9.67	9.99	9.75	9.53	10.19	10.62	9.88	9.92	10.49	8.18	8.99	9.04
Defb14	0.893333	1.85746	0.193477	0.771585	UNDETECTED	4.91	5.77	6.36	5.95	5.16	5.23	5.9	5.51	4.37	7.63	7.62	7.71
Map4k2	-0.278333	-1.21279	0.194659	0.771585	DETECTED	9.58	9.01	9.32	9.16	9.21	9.49	9.15	8.92	9.26	8.33	8.85	9.59
Psmc2	-0.0883333	-1.06314	0.199196	0.778306	DETECTED	14.13	14.27	14.23	14.38	14.47	14.38	14.13	14.28	14.26	14.29	14.3	14.07
Itgam	-0.268333	-1.20442	0.199201	0.778306	DETECTED	12.37	12.51	12.57	12.33	12.61	12.9	12.49	12.38	12.67	12.6	11.92	11.62
Src	-0.436667	-1.35347	0.203081	0.78328	DETECTED	11.51	11.52	11.77	11.85	11.47	11.36	11.34	11.58	11.15	9.78	11.16	11.85
Ccl6	-0.62	-1.53688	0.203989	0.78328	DETECTED	12.02	12.14	13.17	12.29	12.29	12.09	12.36	12.25	12.14	11.89	11.92	9.72
Tcf4	-0.231667	-1.17419	0.205345	0.78328	DETECTED	14.23	14.11	13.89	14.14	14.05	13.87	14.05	14.12	13.92	13.16	13.58	14.07
Ltb4r2	0.551667	1.46578	0.207413	0.78328	UNDETECTED	4.13	5.53	5.33	3.65	4.59	5.25	5.21	4.55	5.18	4.79	5.65	6.41
Tnfrsf13b	-0.248333	-1.18783	0.207712	0.78328	DETECTED	8.27	8.51	7.8	8.24	8.61	8.98	8.14	7.97	8.03	8.41	8.34	8.03
Ccrl2	-0.65	-1.56917	0.210786	0.78328	DETECTED	8.73	8.55	8.61	8	8.99	10.28	9.26	7.48	9.07	6.9	8.36	8.19
Cd209g	-0.263333	-1.20025	0.212955	0.78328	DETECTED	9.41	8.96	9.7	8.68	9.71	9.34	9.29	8.71	8.86	9.08	9.33	8.95
C1qbp	-0.131667	-1.09556	0.213278	0.78328	DETECTED	14.19	14.23	14.37	14.53	14.32	14.17	14.13	14.32	14.06	14.39	14.27	13.85
Icosl	-0.258333	-1.1961	0.213916	0.78328	DETECTED	10.07	10.1	9.24	9.7	10.28	10.38	9.78	9.55	10.03	9.65	9.68	9.53
Il23r	-0.935	-1.91189	0.216059	0.78328	UNDETECTED	3.67	4.63	5.82	4	5.42	6.08	5.47	2.24	4.91	2.43	5.15	3.81
Psmb9	0.66	1.58008	0.219461	0.785507	DETECTED	13.18	12.87	12.67	10.72	13.39	13.81	13.46	12.63	13.76	13.58	13.06	14.11
Abcb10	-0.296667	-1.2283	0.220613	0.785507	DETECTED	9.99	10.1	9.79	10.38	10.08	10.03	10.12	10.09	9.79	9.33	10.26	9
Il1rn	-0.478333	-1.39313	0.221148	0.785507	DETECTED	10.84	9.84	11.74	10.17	10.73	11.03	11	10.32	10.86	9.61	9.6	10.09
Ccr3	-0.903333	-1.87038	0.224187	0.787555	UNDETECTED	4.91	5.77	7.9	5.97	6.88	5.67	6.88	4.55	6.32	3.4	6.05	4.48
Tyrobp	0.338333	1.2643	0.224667	0.787555	DETECTED	14.66	14.83	14.44	14.17	15.01	15.57	14.76	14.67	15.44	15.57	14.8	15.47
Relb	-0.148333	-1.10829	0.226044	0.787555	DETECTED	12.87	12.51	12.98	12.52	12.64	12.77	12.74	12.71	12.75	12.35	12.28	12.57
Ifi35	0.303333	1.23399	0.228351	0.789934	DETECTED	12.56	12.73	12.52	12.05	13.16	13.5	13.08	12.81	13.45	13.18	12.92	12.9
Nfkbiz	-0.308333	-1.23828	0.237493	0.807915	DETECTED	12.21	11.93	12.58	11.72	12.15	12.45	11.95	11.65	12.05	11.52	11.3	12.72
Gzmb	0.626667	1.54399	0.239873	0.807915	DETECTED	11.01	10.63	10.46	8.83	11.3	12.03	11.58	10.72	11.8	11.6	10.6	11.72
Ms4a1	-0.69	-1.61328	0.240918	0.807915	DETECTED	6.93	7.61	6.34	7.38	7.61	7.72	7.15	7.11	7.47	6.46	7.05	4.21
Cul9	-0.706667	-1.63203	0.243704	0.807915	DETECTED	6.69	7.48	6.99	7.44	6.98	8.22	7.23	6.56	7.87	4.25	7.05	6.6
Mapkapk2	-0.106667	-1.07674	0.250085	0.814901	DETECTED	12.98	13.07	13.13	12.96	13.22	13.31	13.02	13.13	13.19	12.72	12.95	13.02
Ikbke	-0.245	-1.18509	0.251037	0.814901	DETECTED	11.15	11.26	11.15	10.87	11.5	11.85	11.31	11	11.59	10.84	11	10.57
Maf	-0.32	-1.24833	0.251888	0.814901	DETECTED	9.78	10.46	10.18	10.6	9.96	10.55	9.9	10.59	10.45	9.48	10	9.19
H60a	-0.213333	-1.15936	0.252762	0.814901	DETECTED	10.84	10.77	10.72	11.43	10.78	10.49	10.83	10.89	10.21	10.32	10.86	10.64
Nox4	-0.535	-1.44894	0.25326	0.814901	DETECTED	8.22	8.06	9.29	8.9	8.04	7.74	8.05	8.73	7.98	6.42	8.67	7.19
Stat1	0.63	1.54756	0.257239	0.819342	DETECTED	14.13	14.1	13.88	11.93	14.61	15.32	14.82	14.21	15.45	14.31	14.05	14.91
Jak2	-0.251667	-1.19058	0.260372	0.819342	DETECTED	12.77	12.83	12.87	12.53	12.96	13.09	12.8	12.78	13.15	11.94	12.11	12.76
Tnfrsf8	0.731667	1.66056	0.261003	0.819342	UNDETECTED	4.13	4.96	4.45	5.62	2.3	3.93	4.61	3.67	5.62	6.32	5.42	4.14
Spn	0.163333	1.11987	0.266438	0.819342	DETECTED	12.7	12.5	12.28	12.41	12.64	12.76	12.8	12.67	12.92	12.38	12.41	13.09
Cxcr4	-0.33	-1.25701	0.268848	0.819342	DETECTED	10.38	10.07	10.32	10.36	9.89	10.36	9.83	10.4	10.01	9.9	10.52	8.74
Phlpp1	-0.333333	-1.25992	0.268902	0.819342	DETECTED	9.76	9.56	9.33	9.93	9.62	10.28	9.72	9.78	9.75	8.28	9.77	9.18
Cxcl11	0.78	1.71713	0.269556	0.819342	DETECTED	10.36	10.7	10.53	7.88	11.72	12.13	11.61	11.1	12.26	10.85	10.96	11.22
Il1rl2	-0.2	-1.1487	0.27328	0.819342	DETECTED	11.14	11.17	10.94	11.52	11.13	11.1	10.92	11.47	11.31	10.62	10.94	10.54
Ets1	-0.206667	-1.15402	0.273795	0.819342	DETECTED	12.8	12.93	12.85	12.8	12.98	13.24	12.87	12.9	13.12	12.15	12.33	12.99
Il18	-0.291667	-1.22405	0.274684	0.819342	DETECTED	9.59	9.68	9.75	9.57	10.31	10.56	10.06	9.52	10.05	9.66	9.6	8.82
Cd14	-0.223333	-1.16743	0.275564	0.819342	DETECTED	12.99	12.54	13.3	12.81	12.43	12.18	12.66	12.71	12.25	12.71	12.33	12.25
Ccr4	-0.708333	-1.63392	0.276619	0.819342	UNDETECTED	4.53	2.91	4.77	2.1	1.74	3.95	3.09	3.35	2.92	1.82	1.49	3.08
Casp3	-0.0566667	-1.04006	0.277147	0.819342	DETECTED	13.92	13.73	13.62	13.81	13.81	13.8	13.66	13.73	13.75	13.84	13.67	13.7
Ptger4	0.298333	1.22972	0.277502	0.819342	DETECTED	7.05	7.74	7.69	6.85	8.04	8.19	7.7	7.71	8.14	7.5	8.4	7.9
Cd24a	-0.396667	-1.31646	0.280285	0.819342	DETECTED	7.96	8.61	8.8	7.06	9.04	9.07	8.14	7.84	8.2	7.62	8.1	8.26
Cxcl15	0.923333	1.89649	0.281521	0.819342	UNDETECTED	5.23	6.48	4.45	2.07	3.19	1.83	4.92	5.3	5.16	5.06	4.21	4.14
H2-DMb2	-0.55	-1.46409	0.28393	0.819342	DETECTED	9.64	9.72	9.23	9.57	10.04	10.19	9.74	9.72	10.14	9.02	9.38	7.09
Tyk2	-0.315	-1.24401	0.284598	0.819342	DETECTED	9.39	9.36	9.04	9.4	9.64	9.71	9.78	9.4	9.24	7.95	9.08	9.2
Arhgdib	0.111667	1.08048	0.287734	0.820786	DETECTED	15.33	15.46	15.14	15.37	15.63	15.58	15.35	15.39	15.59	15.78	15.44	15.63
Traf3	-0.491667	-1.40607	0.290721	0.820786	DETECTED	10.29	10.24	10.48	10.51	10.71	10.93	10.4	10.57	10.45	8.19	9.64	10.96
Fcgr2b	-0.303333	-1.23399	0.29164	0.820786	DETECTED	15.6	15.5	15.41	15.68	15.19	15.06	15.45	15.7	15.32	15.13	15.05	13.97
Ifnar2	-0.323333	-1.25122	0.294523	0.820786	DETECTED	12.71	12.68	12.56	12.47	12.72	13.04	12.6	12.61	12.95	12.37	12.63	11.08
Igf2r	-0.27	-1.20581	0.296129	0.820786	DETECTED	10.85	10.76	10.72	10.78	11.33	11.29	10.76	10.76	11.17	9.75	10.53	11.14
Psmd7	0.125	1.09051	0.29909	0.820786	DETECTED	14.22	14.27	14.21	14.37	14.42	14.29	14.25	14.28	14.14	14.7	14.39	14.77
Btnl2	-0.538333	-1.45229	0.300813	0.820786	DETECTED	6.21	7.16	6.65	5.09	6.77	7.17	6.08	4.55	6.81	7.01	6.04	5.33
Csf1r	0.165	1.12117	0.306682	0.820786	DETECTED	13	13.47	12.68	13.09	13.18	13.57	13.13	13.31	13.59	13.38	13.43	13.14
Kir3dl2	-0.57	-1.48452	0.308102	0.820786	UNDETECTED	4.9	5.53	4.1	6	5.66	4.22	3.9	3.98	5.82	3.36	4.2	5.73
Il16	-0.33	-1.25701	0.309145	0.820786	DETECTED	8.83	9.15	8.6	8.73	9.17	9.95	8.97	8.92	9.41	8.44	8.96	7.75
Irak1	-0.13	-1.09429	0.311	0.820786	DETECTED	12.2	12.07	12.29	12.36	12.3	12.27	12.35	12.3	12.18	11.6	12.08	12.2
Socs3	-0.338333	-1.2643	0.311737	0.820786	DETECTED	10.3	9.8	10.76	9.82	9.96	10.36	9.87	9.86	9.45	9.49	9.21	11.09
Klrc3	-0.92	-1.89212	0.312683	0.820786	UNDETECTED	4.13	6.33	4.77	1.53	4.28	5.26	4.27	1.78	2.04	4.44	5.16	3.09
H2-K1	0.268333	1.20442	0.313157	0.820786	DETECTED	14.89	14.66	14.55	13.71	14.97	15.28	15.08	14.71	15.39	14.8	14.63	15.06
Ctsc	-0.356667	-1.28046	0.313808	0.820786	DETECTED	12.08	12.4	11.73	11.33	12.4	13.11	12.17	11.93	12.69	11.35	11.38	11.39
Tap1	0.431667	1.34879	0.313855	0.820786	DETECTED	13.51	13.31	13.07	11.68	13.8	14.26	13.86	13.16	14.25	13.51	13.39	14.05
Tnfrsf1b	0.268333	1.20442	0.314292	0.820786	DETECTED	11.84	11.68	11.6	11.29	11.67	12.21	12.04	11.8	12.19	11.25	11.77	12.85
Casp8	-0.0816667	-1.05824	0.315671	0.820786	DETECTED	12.8	12.83	12.83	12.66	12.91	13.12	12.71	12.73	12.9	12.9	12.8	12.62
Ltb4r1	-0.326667	-1.25411	0.316488	0.820786	DETECTED	7.84	7.62	8.75	7.6	7.94	8.65	8.67	7.89	7.76	7.06	7.26	7.8
Il2rb	0.616667	1.53333	0.317019	0.820786	DETECTED	12.62	12.26	11.44	10.09	12.68	13.4	12.84	12.11	13.61	12.29	11.67	13.67
Notch1	-0.345	-1.27015	0.317744	0.820786	DETECTED	11.31	11.08	11.22	10.83	11	11.48	11.15	11.29	11.18	9.64	10.13	11.46
Ccr6	-0.606667	-1.52274	0.318821	0.820786	UNDETECTED	4.54	6.48	6.2	4.86	5.65	6.66	5.21	4.55	6.31	4.81	6.39	3.48
Gfi1	0.776667	1.71317	0.323463	0.820786	UNDETECTED	5.52	5.77	2.93	2.93	5.42	4.21	5.9	5.07	5.63	2.93	5.15	6.76
Cd44	-0.18	-1.13288	0.325259	0.820786	DETECTED	14.37	14.16	14.55	14.52	14.23	14.23	14.23	14.27	14.05	13.94	13.68	14.81
Tapbp	0.423333	1.34102	0.326685	0.820786	DETECTED	13.85	13.82	13.4	12.54	14.32	14.67	14.17	13.78	14.67	13.55	13.68	15.29
Cx3cr1	0.305	1.23542	0.32741	0.820786	DETECTED	12.11	12.47	10.56	12.07	11.99	11.71	11.86	12.31	12.11	12.32	12.32	11.82
Klrb1	-0.835	-1.78386	0.3294	0.820786	UNDETECTED	5.52	4.96	4.45	4.63	1.02	4.5	3.51	1.24	4.01	4.75	3.47	3.09
Mbp	-0.976667	-1.96791	0.330073	0.820786	UNDETECTED	5.23	6.48	5.33	3.99	5.17	5.25	5.7	4.82	4.64	-0.01	5.15	5.29
Fcgr3	-0.52	-1.43396	0.330805	0.820786	DETECTED	13.65	13.59	13.38	13.46	13.42	13.82	13.58	13.58	13.76	13.36	13.26	10.66
Tnfrsf17	-0.323333	-1.25122	0.334116	0.820786	DETECTED	7.24	7.55	7.08	7.91	6.52	7.14	7.31	7.03	6.84	6.87	7.64	5.81
Traf1	-0.143333	-1.10445	0.334722	0.820786	DETECTED	10.25	9.95	10.43	10.38	10.1	10.49	10.16	10.27	10.2	9.67	9.97	10.47
Pigr	-0.486667	-1.4012	0.33539	0.820786	UNDETECTED	3.17	3.41	2.94	3.35	4.6	3.01	3.9	2.24	2.04	3.71	3.86	1.81
Hlx	0.198333	1.14737	0.33607	0.820786	DETECTED	9.39	9.76	9.9	9.59	9.77	9.74	9.62	9.9	9.84	9.53	9.72	10.73
Tslp	0.281667	1.2156	0.337238	0.820786	DETECTED	6.69	7.16	6.35	7.01	5.65	7.06	6.53	6.67	6.83	6.84	7.46	7.28
Il15	0.233333	1.17555	0.337618	0.820786	DETECTED	10.16	9.53	9.92	9.25	10.01	10.6	10.31	9.62	10.52	10.2	10.07	10.15
Gm10499	0.305	1.23542	0.347438	0.830742	DETECTED	14.47	14.25	14.08	13.35	14.5	14.74	14.31	13.9	14.48	14.69	14.25	15.59
Bst2	0.258333	1.1961	0.347974	0.830742	DETECTED	15.56	15.7	15.41	14.72	16.11	16.3	15.93	15.54	16.38	15.98	15.64	15.88
H2-Ob	-0.49	-1.40444	0.349034	0.830742	DETECTED	7.78	7.16	6.76	5.51	7.95	8.08	7.23	6.45	7.34	6.97	6.95	5.36
Stat5a	-0.235	-1.17691	0.350331	0.830742	DETECTED	9.51	9.65	9.63	9.18	9.98	10.38	9.71	9.51	9.96	8.73	9.39	9.62
Fadd	-0.261667	-1.19886	0.351551	0.830742	DETECTED	8.02	8.55	8.15	8.94	8.33	9.11	8.6	8.51	8.44	7.31	8.14	8.53
Batf3	0.413333	1.33176	0.351777	0.830742	DETECTED	7.25	7.68	6.74	6.3	8.22	8.88	8.05	7.5	8.13	7.9	7.62	8.35
Pml	-0.241667	-1.18236	0.353169	0.830742	DETECTED	12.69	12.81	12.51	12.53	12.94	13.16	12.82	12.81	13.18	11.62	12.35	12.41
Tnfrsf4	-0.528333	-1.44226	0.35515	0.830742	DETECTED	9.05	8.58	8.64	7.92	8.99	9.27	8.83	8.82	9.59	7.92	8.04	6.08
Cxcr5	-0.646667	-1.56555	0.355381	0.830742	UNDETECTED	5.52	5.77	3.36	2.96	2.77	5.26	5.21	3.35	2.93	3.33	3.85	3.09
S100a9	-0.916667	-1.88775	0.357764	0.832703	DETECTED	10.46	8.25	12.88	8.38	10.18	10.5	8.4	7.73	8.56	10.67	8.11	11.68
Il12b	-0.64	-1.55833	0.359265	0.832703	DETECTED	7.25	7.62	7.69	7.02	8.82	9.75	7.91	7.71	8.17	7.77	7.89	4.86
Tgfbr2	-0.125	-1.09051	0.362889	0.837554	DETECTED	13.17	13.32	13.04	13.18	13.42	13.64	13.18	13.2	13.61	12.92	13.09	13.02
Atm	-0.291667	-1.22405	0.365371	0.839488	DETECTED	10.01	10.19	10.12	10.27	10.19	10.6	10.37	10.42	10.5	8.71	9.52	10.11
Cxcl10	0.475	1.38992	0.366796	0.839488	DETECTED	11.85	12.21	12.19	10.4	13.19	13.51	12.77	12.4	13.43	12.41	12.11	13.08
Trp53	0.33	1.25701	0.368402	0.83965	DETECTED	11.98	11.8	11.88	12	12.06	11.87	11.92	11.96	12.09	11.76	11.93	13.91
Folr4	0.643333	1.56193	0.371074	0.841147	UNDETECTED	6.21	3.41	4.1	4.29	5.65	6.89	5.9	5.07	7.35	4.49	6.06	5.54
Lef1	-0.3	-1.23114	0.372134	0.841147	DETECTED	8.95	9.11	9	9.55	9.35	9.04	9.23	9.71	9.12	7.56	8.84	8.74
Gpi1	-0.263333	-1.20025	0.374829	0.843751	DETECTED	9.23	8.2	8.88	8.94	8.48	8.2	9	8.62	7.85	8.04	7.85	8.99
Jak3	0.333333	1.25992	0.377748	0.846836	DETECTED	10.05	9.73	10.21	9.64	9.85	10.26	10.29	9.85	10.01	9.8	9.87	11.92
Irak3	-0.268333	-1.20442	0.379912	0.848211	DETECTED	9.3	9.22	9.26	8.89	9.31	10.46	9.47	9.09	9.69	9	9.25	8.33
Fcer1g	0.231667	1.17419	0.384945	0.852501	DETECTED	13.27	13.49	13.15	12.84	13.75	14.33	13.51	13.39	14.11	14.04	13.34	13.83
Prf1	0.686667	1.60956	0.387142	0.852501	DETECTED	10.82	9.55	9.53	7.15	10.41	11.5	11.18	9.37	10.75	10.63	9.19	11.96
Fyn	-0.186667	-1.13813	0.3875	0.852501	DETECTED	11.85	12.05	11.8	11.61	12.06	12.56	11.99	11.92	12.38	11.25	11.63	11.64
H2-Ea-ps	0.65	1.56917	0.390157	0.852501	DETECTED	16.17	15.74	14.74	12.71	16.15	17.37	16.15	15.49	17	16.36	15.22	16.56
H2-Q10	-0.5	-1.41421	0.390578	0.852501	UNDETECTED	5.23	3.85	5.06	5.81	6.23	5.01	5.21	2.64	4.92	4.79	5.87	4.76
C1ra	0.255	1.19334	0.391184	0.852501	DETECTED	13.9	13.67	13.43	12.77	13.97	14.54	14.17	13.89	14.55	13.74	13.54	13.92
H2-Ab1	0.621667	1.53865	0.39541	0.855239	DETECTED	14.93	14.35	13.65	11.43	14.84	15.99	14.96	14.26	15.77	15.04	14.06	14.83
Ccl9	-0.228333	-1.17148	0.395568	0.855239	DETECTED	13.41	13.53	14.28	13.71	13.82	13.62	13.7	13.66	13.78	13.9	13.54	12.42
Tnfsf11	-0.463333	-1.37872	0.401449	0.864537	DETECTED	7.15	6.48	7.19	5.53	6.52	8.05	6.77	6.32	7.18	4.56	7.15	6.16
Lta	-0.391667	-1.31191	0.406086	0.864666	DETECTED	6.81	7.24	6.64	6.09	6.52	7.24	6.77	5.88	7.8	6.43	6.5	4.81
Fn1	-0.281667	-1.2156	0.407217	0.864666	DETECTED	16.89	16.05	16.73	16.27	15.98	15.98	16.54	16.5	16.12	15.14	15.24	16.67
Cish	-0.456667	-1.37237	0.407941	0.864666	DETECTED	7.04	6.48	6.35	6.25	6.52	7.95	7.24	6.77	7.01	4.22	6.63	5.98
Foxp3	-0.586667	-1.50177	0.408916	0.864666	UNDETECTED	5.53	6.48	6.99	5.74	7.79	8	7.31	5.5	7.85	4.21	5.83	6.31
Cx3cl1	-0.263333	-1.20025	0.414879	0.864666	DETECTED	7.04	6.17	6.5	6.24	6.38	7.9	6.66	6.67	5.87	6.27	6.36	6.82
Cxcr3	0.55	1.46409	0.416014	0.864666	DETECTED	7.25	7.8	6.86	5.23	8.37	9.07	8.3	8.28	9.29	7.24	7.79	6.98
C9	-0.693333	-1.61702	0.419268	0.864666	UNDETECTED	0.8	3.85	2.46	4.92	5.17	3.02	4.61	1.24	2.5	3.31	2.12	2.28
Ly86	-0.435	-1.35191	0.419458	0.864666	DETECTED	12.49	12.78	12.1	11.77	12.79	13.38	12.56	12.27	13.2	12.39	12.32	9.96
Ltf	-0.65	-1.56917	0.419636	0.864666	UNDETECTED	6	4.96	3.75	4.01	2.3	5.26	4.27	2.64	5.61	1.85	4.55	3.46
Cd96	-0.546667	-1.46071	0.420284	0.864666	UNDETECTED	6.01	5.77	3.74	4.87	6.06	6.39	6.25	4.82	3.34	4.14	6.54	4.47
Cd40lg	-0.591667	-1.50699	0.421812	0.864666	UNDETECTED	6.93	6.17	4.1	4.58	5.65	6.66	5.21	5.07	4.93	6.36	6.23	2.74
Nox3	-0.435	-1.35191	0.423435	0.864666	UNDETECTED	3.17	1.65	2.47	2.57	1.02	1.84	2.09	1.25	2.92	-0.07	2.12	1.8
Il27	-0.58	-1.49485	0.424728	0.864666	DETECTED	6.93	7.06	6	3.93	7.79	7.85	4.92	6.45	5.22	5.88	6.51	7.1
Ctnnb1	-0.0883333	-1.06314	0.425105	0.864666	DETECTED	14.68	14.61	14.6	14.74	14.57	14.61	14.66	14.76	14.71	14.09	14.49	14.57
Sh2d1a	0.408333	1.32715	0.42875	0.864666	DETECTED	9.37	9.04	8.49	7.17	9.74	10.43	9.47	9.29	10.06	9.47	8.99	9.41
Il25	-0.501667	-1.41585	0.430072	0.864666	UNDETECTED	4.12	4.26	2.46	0.84	3.58	3.02	1.44	3.01	3.3	1.82	2.62	3.08
Il15ra	0.311667	1.24114	0.43284	0.864666	DETECTED	8.27	8.2	8.06	7.24	8.76	9.5	8.3	8.16	9.11	8.3	8.5	9.53
Tlr5	-0.27	-1.20581	0.436773	0.864666	DETECTED	7.5	7.16	8.31	7.2	7.47	7.45	7.06	7.56	7.94	5.97	7.29	7.65
Irf1	0.331667	1.25847	0.438928	0.864666	DETECTED	14.6	14.32	14.39	12.67	14.85	15.33	14.87	14.18	15.11	14.69	14.25	15.05
Pdcd2	-0.0966667	-1.0693	0.438947	0.864666	DETECTED	9.93	9.73	9.67	10	9.51	9.68	9.56	9.74	9.25	9.84	9.67	9.88
Syk	-0.143333	-1.10445	0.439426	0.864666	DETECTED	11.35	11.49	11.28	11.06	11.55	12.09	11.4	11.41	11.73	10.98	11.31	11.13
Irak4	-0.131667	-1.09556	0.44044	0.864666	DETECTED	12.12	12.2	11.9	12.17	12.28	12.55	12.29	12.18	12.46	11.81	12.15	11.54
Xcl1	0.396667	1.31646	0.442088	0.864666	DETECTED	10.91	11.26	10.12	9.24	11.55	11.75	11.23	11.15	12.34	11.42	11.04	10.03
Traf5	0.105	1.07549	0.442521	0.864666	DETECTED	11.13	11.03	10.68	11.14	11.27	11.5	11.19	11.49	11.32	11.23	11.16	10.99
Il17a	-0.476667	-1.39152	0.446153	0.864666	UNDETECTED	6.38	5.53	3.74	5.39	5.42	4.21	6.66	3.35	4.03	4.47	4.54	4.76
Traf4	-0.168333	-1.12376	0.446354	0.864666	DETECTED	8.7	8.44	8.51	8.68	8.48	8.74	8.47	8.45	8.84	7.5	8.46	8.82
Casp1	0.216667	1.16205	0.447356	0.864666	DETECTED	13.28	13.05	12.85	12.21	13.6	13.92	13.51	13	13.75	13.49	13.12	13.34
Itgax	-0.33	-1.25701	0.450759	0.864666	DETECTED	10.06	9.35	9.62	8.45	9.88	10.55	9.65	9.42	10.48	9.03	9.1	8.25
Il27ra	0.296667	1.2283	0.45112	0.864666	DETECTED	8.89	8.01	8.1	7.86	8.92	9.71	9.58	8.64	9.65	8.28	8.64	8.48
Irgm1	0.406667	1.32562	0.452063	0.864666	DETECTED	14.88	14.84	14.58	12.59	15.41	15.96	15.33	14.5	15.75	14.97	14.67	15.48
Cmklr1	0.15	1.10957	0.45225	0.864666	DETECTED	10.41	10.66	10.41	10.06	10.79	11.12	10.64	10.7	11.25	10.35	10.66	10.75
C7	-0.423333	-1.34102	0.455585	0.864666	UNDETECTED	5.53	5.77	5.81	5.36	6.05	5.88	4.92	4.55	3.7	6.64	7	5.05
Ltbr	-0.0483333	-1.03407	0.45661	0.864666	DETECTED	12.37	12.46	12.43	12.59	12.51	12.53	12.24	12.54	12.34	12.55	12.54	12.39
Emr1	-0.401667	-1.32103	0.460036	0.864666	DETECTED	13.49	13.81	12.94	13.17	13.91	14.55	13.49	13.61	14.5	13.36	13.38	11.12
Ifit2	-0.238333	-1.17963	0.461371	0.864666	DETECTED	12.14	12.67	12.54	11.93	13.12	13.48	12.49	12.51	13.26	11.81	12.21	12.17
Rae1	0.0716667	1.05093	0.461457	0.864666	DETECTED	12.87	12.77	13.08	13.06	12.84	12.88	12.85	13	12.75	13.03	12.99	13.31
Stat2	0.391667	1.31191	0.465039	0.864666	DETECTED	10.93	11.19	10.7	9.52	11.89	12.49	11.65	11.26	12.3	10.4	11.17	12.29
Hcst	0.266667	1.20303	0.465178	0.864666	DETECTED	7.58	7.86	7.74	7.21	8.55	9.19	8.01	7.8	8.43	8.11	8.27	9.11
H2-DMa	0.303333	1.23399	0.466647	0.864666	DETECTED	12.85	12.88	12.11	11.38	13.12	13.81	13.16	12.69	13.83	13.12	12.56	12.61
Stat4	-0.386667	-1.30737	0.469581	0.864666	DETECTED	8.92	9.08	8.23	8.05	9.48	10.01	9.47	8.81	9.87	7.35	8.41	7.54
Rela	-0.12	-1.08673	0.471686	0.864666	DETECTED	11.69	11.57	11.83	11.65	11.71	11.66	11.71	11.66	11.56	10.91	11.51	12.04
Cd5	-0.485	-1.39959	0.473172	0.864666	DETECTED	7.9	8.58	7.25	6.92	8.37	9.97	8.22	8.24	9.2	6.95	7.61	5.86
Cd79b	-0.331667	-1.25847	0.473446	0.864666	DETECTED	7.57	8.06	6.75	7.78	7.6	8.83	6.76	7.81	7.95	7.83	8.22	6.03
Il2	0.428333	1.34568	0.473919	0.864666	UNDETECTED	4.9	5.53	4.11	3.67	2.77	5.48	4.92	5.07	5.82	3.75	5.66	3.81
Fcgr1	-0.276667	-1.21139	0.473921	0.864666	DETECTED	13.31	13.59	13.22	12.61	14.05	14.47	13.43	13.28	14.21	13.26	13.18	12.23
Cd244	-0.441667	-1.35817	0.474222	0.864666	UNDETECTED	3.17	3.85	4.77	4.01	5.87	4.22	4.61	4.28	4.01	1.85	3.47	5.02
Tal1	-0.29	-1.22264	0.480555	0.866675	DETECTED	7.05	7.85	8.17	8.22	7.66	8.06	7.58	8.24	8.05	6.2	8.33	6.87
Serping1	0.315	1.24401	0.480737	0.866675	DETECTED	12.05	11.91	11.96	10.7	12.56	13.4	12.45	11.85	13.02	12.12	11.9	13.13
Entpd1	-0.211667	-1.15803	0.485658	0.866675	DETECTED	11.98	11.96	11.64	11.09	12.18	12.92	11.92	11.58	12.43	11.64	11.45	11.48
Nox1	-0.565	-1.47939	0.487815	0.866675	UNDETECTED	6.2	4.63	3.36	4.32	5.66	4.22	6.09	1.78	3.32	5.79	4.21	3.81
Ccbp2	0.43	1.34723	0.489051	0.866675	UNDETECTED	6.01	5.53	4.44	2.93	3.94	6.24	5.7	5.3	5.63	4.13	5.87	5.04
Kit	-0.298333	-1.22972	0.490408	0.866675	DETECTED	8.07	7.91	7.92	8.25	7.4	7.86	8.67	8.21	8.18	6.38	7.67	6.51
Gp1bb	-0.586667	-1.50177	0.491707	0.866675	DETECTED	4.13	6.62	5.57	7.22	6.52	7.42	6.66	5.7	6.02	2.5	6.65	6.43
Tnfsf10	0.343333	1.26868	0.495821	0.866675	DETECTED	9.79	10.2	9.22	8.26	10.43	11.28	10.45	10.23	11.14	9.65	9.77	10
Cd48	0.258333	1.1961	0.497857	0.866675	DETECTED	10.24	10.53	10	9.76	10.94	11.66	10.62	10.05	11.38	10.43	10.66	11.54
Lcp2	-0.0933333	-1.06683	0.498887	0.866675	DETECTED	8.52	8.71	8.82	8.53	8.81	9.3	8.72	8.39	8.75	8.77	8.78	8.72
Cd34	-0.0983333	-1.07054	0.501823	0.866675	DETECTED	16.68	16.44	16.65	16.73	16.56	16.3	16.54	16.56	16.35	16.7	16.71	15.91
Il9	-0.326667	-1.25411	0.501996	0.866675	UNDETECTED	5.78	4.96	5.06	4.3	4.89	5.69	4.92	3.67	4.03	4.79	6.55	4.76
Tlr1	-0.231667	-1.17419	0.502628	0.866675	DETECTED	10.39	10.54	10.15	10	10.83	11.5	10.62	10.51	11.25	9.95	10.22	9.47
Mapk1	-0.0383333	-1.02693	0.502854	0.866675	DETECTED	13.91	13.82	13.84	13.9	13.94	13.97	13.89	13.9	13.9	13.68	13.76	14.02
Ikbkb	-0.08	-1.05702	0.503316	0.866675	DETECTED	11.33	11.4	11.04	11.49	11.39	11.54	11.43	11.31	11.4	10.89	11.19	11.49
Rag1	-0.43	-1.34723	0.504593	0.866675	UNDETECTED	6.38	3.85	4.1	3.99	5.66	6.07	6.09	3	4.92	4.46	4.54	4.46
Cd4	0.27	1.20581	0.51239	0.866675	DETECTED	8.4	7.96	7.68	7.06	7.99	9.21	8.86	7.85	9.17	7.83	8.64	7.57
Il17rb	0.376667	1.29834	0.513648	0.866675	UNDETECTED	3.68	5.98	4.1	5.39	4.89	4.49	5.21	6.34	5.41	3.36	4.54	5.93
Il12a	-0.368333	-1.29086	0.514882	0.866675	UNDETECTED	4.54	6.17	5.33	4.29	7.17	6.06	4.61	5.51	6.17	4.15	5.86	5.05
Irf5	-0.238333	-1.17963	0.515001	0.866675	DETECTED	10.91	11.31	11.07	10.52	11.67	12.21	11.32	11.05	11.97	10.94	10.94	10.04
Zap70	0.366667	1.28937	0.515983	0.866675	DETECTED	8.31	7.96	7.55	5.63	8.51	8.87	8.78	7.89	8.73	7.87	7.18	8.58
Tlr2	-0.215	-1.1607	0.517126	0.866675	DETECTED	9.76	9.69	9.06	8.95	9.68	10.24	9.55	9.41	10.14	9.11	9.59	8.29
Il10rb	-0.17	-1.12506	0.517359	0.866675	DETECTED	12.52	12.55	12.39	12.41	12.65	13.02	12.55	12.7	13.07	12.28	12.52	11.4
C3	0.376667	1.29834	0.518826	0.866675	DETECTED	12.32	12.17	12	10.26	12.69	13.72	13.11	12.7	13.72	12	11.54	12.35
Il4	-0.44	-1.3566	0.519372	0.866675	UNDETECTED	6.2	4.63	3.35	6.46	5.87	4.75	4.61	6.2	4.92	4.13	5.65	3.11
Selplg	0.433333	1.35035	0.521183	0.866675	UNDETECTED	1.87	3.85	4.77	4.33	4.28	4.22	3.51	3.01	5.4	4.44	3.47	6.09
Psmb5	0.0633333	1.04488	0.521347	0.866675	DETECTED	13.76	13.78	13.76	13.91	13.88	13.72	13.76	13.75	13.67	14.22	14.04	13.75
Marco	-0.471667	-1.38671	0.522207	0.866675	DETECTED	7.5	6.97	7.09	5.28	7.33	8.91	7.81	6.67	7.54	4.25	6.62	7.36
Tgfb3	-0.133333	-1.09682	0.524045	0.866675	DETECTED	10.76	10.74	10.62	10.72	11.09	10.7	10.78	10.81	10.76	9.82	11.17	10.49
Ikbkap	-0.111667	-1.08048	0.524713	0.866675	DETECTED	10.39	10.18	10.57	10.5	10.25	10.25	10.33	10.45	10.16	9.76	9.95	10.82
Cd3d	0.38	1.30134	0.525115	0.866675	DETECTED	10.54	9.79	9.32	8.03	10.2	11.63	10.9	9.53	11.25	10.44	9.54	10.13
Il12rb1	-0.348333	-1.27309	0.526026	0.866675	DETECTED	8.69	7.74	7.62	7.29	8.48	9.35	8.86	7.1	8.7	7.27	6.44	8.71
Ciita	0.435	1.35191	0.528554	0.867191	DETECTED	10.6	10.36	9.37	7.65	10.85	12.04	10.93	10	11.5	10.04	10.4	10.61
Tnfrsf14	0.24	1.18099	0.52951	0.867191	DETECTED	11.15	11.23	11.03	9.85	11.42	12.04	11.43	11.02	11.98	10.73	10.98	12.02
Cd1d1	-0.273333	-1.2086	0.533184	0.868989	DETECTED	8.59	9.8	9.09	7.98	9.33	10.45	9.35	8.83	9.72	8.74	8.83	8.13
Lck	0.308333	1.23828	0.534979	0.868989	DETECTED	11.43	11.07	10.46	9.58	11.75	12.42	11.71	10.86	12.38	11.59	10.76	11.26
Il2rg	0.176667	1.13027	0.535374	0.868989	DETECTED	11.63	11.66	11.53	10.88	12.16	12.41	12.01	11.82	12.57	11.36	11.62	11.95
Icam4	0.278333	1.21279	0.538287	0.870485	UNDETECTED	4.54	5.53	4.76	4.3	5.65	4.21	5.7	4.27	4.64	4.47	6.55	5.03
Ccl20	-0.408333	-1.32715	0.539478	0.870485	UNDETECTED	4.9	4.96	6.91	3.99	4.89	4.22	6.09	4.28	2.95	5.8	3.84	4.46
Adal	-0.138333	-1.10063	0.542802	0.871011	DETECTED	9.13	9.06	9.07	9.48	9.01	9.1	9.31	9.06	9.23	8.46	9.61	8.35
Il11ra1	0.21	1.15669	0.542988	0.871011	DETECTED	7.57	7.86	7.25	7.01	8.3	8.38	7.45	7.94	8.48	8.02	8.66	7.08
Bid	0.0783333	1.0558	0.545594	0.872352	DETECTED	12.44	12.43	12.32	12.25	12.66	12.81	12.4	12.46	12.49	12.58	12.45	13
Tnfsf13b	-0.263333	-1.20025	0.547867	0.872352	DETECTED	8.66	8.77	6.85	7.41	8.29	9.23	8.18	7.24	8.52	7.88	8.31	7.5
Phlpp2	-0.151667	-1.11085	0.551013	0.872352	DETECTED	10.83	10.55	10.83	10.73	10.92	11.18	10.77	10.77	10.88	9.79	10.45	11.47
Fas	-0.168333	-1.12376	0.551373	0.872352	DETECTED	8.02	8.06	9.02	7.57	8.7	8.57	8.48	8.37	8.47	7.95	8.22	7.44
Il13	-0.385	-1.30586	0.551798	0.872352	UNDETECTED	4.54	6.62	6.52	4.58	6.05	6.06	3.9	6.2	5.43	6.64	6.06	3.83
Lilrb3	-0.186667	-1.13813	0.553788	0.872974	DETECTED	10.43	10.28	9.94	9.5	10.67	11.39	10.2	9.75	10.84	10.11	10.16	10.03
Il2ra	0.32	1.24833	0.55854	0.877935	DETECTED	8.48	8.68	8.75	7.2	9.92	9.57	9.66	9.1	10.47	8.03	8.84	8.42
C1qa	0.14	1.10191	0.560166	0.877967	DETECTED	14.8	15.1	14.39	14.57	15.01	15.53	14.93	15	15.46	15.41	15.08	14.36
Sigirr	0.103333	1.07425	0.563919	0.879447	DETECTED	11.92	11.82	11.87	12.06	11.38	11.34	11.82	11.97	11.6	11.47	11.82	12.33
Irak2	-0.183333	-1.1355	0.566958	0.879447	DETECTED	10.4	9.87	10.59	9.34	10.18	10.8	10.07	9.57	10.27	9.55	9.67	10.95
Btk	-0.133333	-1.09682	0.567128	0.879447	DETECTED	9.86	10.35	9.85	10.15	10.41	11.05	9.93	9.99	10.69	10.05	10.37	9.84
Psmb7	-0.0766667	-1.05458	0.567541	0.879447	DETECTED	13.87	13.84	13.79	13.98	14.04	13.92	13.82	13.88	13.83	14.18	13.98	13.29
Nos2	-0.216667	-1.16205	0.569916	0.880632	DETECTED	7.5	6.62	7.93	7.21	6.97	8.51	7.96	7.44	7.29	6.16	7.36	7.23
Klra21	-0.441667	-1.35817	0.576967	0.886628	UNDETECTED	4.12	0.52	2.94	3.35	3.2	4.23	3.9	1.79	3.66	2.4	0.52	3.44
Jak1	-0.0816667	-1.05824	0.577037	0.886628	DETECTED	13.29	13.24	13.37	13.06	13.43	13.74	13.34	13.38	13.68	12.91	13.11	13.22
Mx1	-0.195	-1.14472	0.581746	0.889467	DETECTED	10.43	11.05	10.79	10.34	11.35	11.8	10.76	10.61	11.69	10.04	10.22	11.27
Ddx58	-0.171667	-1.12636	0.582138	0.889467	DETECTED	13.21	13.55	13.19	12.74	13.77	14.07	13.48	13.39	14.08	12.37	12.99	13.19
Tgfbi	-0.153333	-1.11214	0.58554	0.89151	DETECTED	13.28	13.71	13.33	13.03	14.24	14.25	13.22	13.27	14.28	13.64	13.29	13.22
Klra8	-0.32	-1.24833	0.586734	0.89151	DETECTED	9.74	10.47	9.07	8.54	10.76	11.59	9.95	10.03	10.87	9.27	9.68	8.45
Psmb11	-0.22	-1.16473	0.58869	0.892003	UNDETECTED	3.67	2.91	3.36	4.91	3.94	3.65	2.62	4.28	3.31	2.89	4.22	3.8
Il12rb2	0.35	1.27456	0.595353	0.899609	DETECTED	7.24	6.86	6.17	5.48	8.45	8.87	8.3	6.94	7.98	6.16	7.5	8.29
Bcl2	0.173333	1.12766	0.597376	0.900178	DETECTED	10.22	10.15	10.16	10.21	10.01	10.12	10.42	10.23	10.37	9.56	9.67	11.66
Masp1	-0.105	-1.07549	0.600699	0.901814	DETECTED	9.91	9.73	9.49	9.66	10.21	9.52	10.21	9.49	9.05	9.55	9.74	9.85
Ccl3	-0.305	-1.23542	0.601759	0.901814	DETECTED	9.71	9.06	10.07	8.39	9.56	11.63	10.45	8.63	10.17	8.56	8.85	9.93
Cfd	-0.781667	-1.71912	0.607156	0.904643	DETECTED	8.8	12.93	11.9	4.82	10.69	9.58	9.27	4.77	9.91	10.25	10.89	8.94
Pax5	-0.28	-1.21419	0.608852	0.904643	UNDETECTED	5.23	5.98	2.93	5.15	5.42	5.25	4.27	5.07	4.64	6	3.84	4.46
Smad3	-0.166667	-1.12246	0.609801	0.904643	DETECTED	12.77	12.61	12.3	12.7	12.53	12.5	12.52	12.75	12.75	11.04	12.2	13.15
Ptafr	0.166667	1.12246	0.610262	0.904643	DETECTED	9.43	9.56	9.56	8.79	9.74	10.54	9.97	9.58	10.7	9.2	9.79	9.38
Ctla4	0.266667	1.20303	0.614242	0.908082	DETECTED	8.22	7.8	7.91	6.5	8.76	9.53	8.8	7.84	9.58	7.7	7.87	8.53
Il7r	-0.201667	-1.15003	0.618513	0.91048	DETECTED	8.7	8.51	9.05	8.21	9.37	10.15	9.38	8.39	9.72	7.97	8.41	8.91
Ikzf2	0.241667	1.18236	0.619193	0.91048	DETECTED	8.7	8.28	7.79	7.17	9.02	9.82	8.9	8.42	9.64	7.87	8.17	9.23
Il21r	-0.248333	-1.18783	0.627395	0.916254	DETECTED	6.82	7.96	7.62	7.49	8.64	9.05	8.48	7.98	8.88	6.69	6.81	7.25
Tbk1	-0.0533333	-1.03766	0.628475	0.916254	DETECTED	11.54	11.48	11.46	11.41	11.55	11.59	11.5	11.37	11.52	11.23	11.21	11.88
Ctss	-0.211667	-1.15803	0.635632	0.916254	DETECTED	15.86	16.05	15.19	14.76	16.14	16.73	15.97	15.62	16.63	15.58	15.44	14.22
Klra7	0.335	1.26138	0.637104	0.916254	DETECTED	7.84	8.47	6.62	5.22	8.61	9.11	8.37	7.8	9.25	7.5	8.08	6.88
Slamf1	0.26	1.19748	0.638536	0.916254	UNDETECTED	4.53	5.26	3.74	2.94	4.6	5.48	4.27	4.28	5.62	3.35	4.86	5.73
Eomes	0.26	1.19748	0.639182	0.916254	DETECTED	8.63	9.66	7.59	7.69	9.83	10.07	9.52	9.39	10.17	8.05	8.96	8.94
Nfkb2	-0.0966667	-1.0693	0.640048	0.916254	DETECTED	14.51	14.39	14.57	14.43	14.5	14.31	14.46	14.57	14.42	13.65	14.02	15.01
Pdgfrb	-0.116667	-1.08423	0.64132	0.916254	DETECTED	11.45	11.62	10.93	11.42	11.33	11.55	11.29	11.82	11.7	10.33	11.07	11.39
Traf2	-0.04	-1.02811	0.642727	0.916254	DETECTED	11.07	10.93	11.09	11.13	11.09	11.05	11.14	11.22	11.14	10.97	10.95	10.7
Nfkb1	-0.0566667	-1.04006	0.644527	0.916254	DETECTED	12.88	12.85	12.9	12.71	12.94	13.08	12.96	12.97	13.16	12.43	12.64	12.86
Fcgrt	-0.141667	-1.10318	0.645439	0.916254	DETECTED	13.33	13.56	13.37	13.61	13.43	13.45	13.45	13.77	13.62	13.33	13.8	11.93
Klrc2	-0.305	-1.23542	0.648738	0.916254	DETECTED	8.12	7.8	6.63	5.68	7.94	8.76	8.19	6.44	8.2	7.86	7.03	5.38
Cd74	0.32	1.24833	0.649867	0.916254	DETECTED	17.19	16.63	15.78	13.71	16.95	18.04	17.07	16.39	17.78	16.94	16.05	15.99
Tmem173	-0.0716667	-1.05093	0.651169	0.916254	DETECTED	11.94	12.18	11.91	11.63	12.18	12.42	12.09	12.12	12.31	11.72	11.63	11.96
Cradd	0.113333	1.08172	0.651935	0.916254	DETECTED	9.28	8.96	8.97	9.89	9.01	8.59	8.92	9.32	9.34	8.79	9.93	9.08
Tlr9	-0.261667	-1.19886	0.652163	0.916254	DETECTED	10.09	10.66	9.48	8.9	10.89	11.67	10.33	10.07	11.39	9.76	10.11	8.46
Tnfrsf13c	0.261667	1.19886	0.65357	0.916254	UNDETECTED	5.23	3.85	3.75	2.09	3.94	2.09	4.27	3.01	3.31	3.72	3.47	4.74
Ikzf3	0.508333	1.42241	0.657075	0.916254	DETECTED	6.82	7.68	6.64	1.96	7.25	9.01	7.52	7.18	8.42	6.29	5.09	7.91
Ccl22	-0.156667	-1.11471	0.657593	0.916254	DETECTED	8.89	10.05	9.77	10.35	10.24	10.7	10.01	10.08	10.57	9.38	10.02	9
C1qb	0.111667	1.08048	0.660017	0.916254	DETECTED	14.91	15.12	14.41	14.53	15.11	15.62	14.99	15.05	15.53	15.38	15.08	14.34
Stat5b	-0.055	-1.03886	0.662159	0.916254	DETECTED	11.24	11.18	11.32	11.21	11.54	11.65	11.38	11.31	11.41	10.95	11.15	11.61
Ccl19	0.351667	1.27603	0.663603	0.916254	DETECTED	6.38	4.97	6.35	4.53	7.25	8.01	7.52	6.67	8.03	4.21	5.83	7.34
Ccr2	0.113333	1.08172	0.666062	0.916254	DETECTED	13.14	13.43	12.84	12.37	13.47	13.67	12.95	12.85	13.96	13.43	13.22	13.19
Cd97	0.113333	1.08172	0.666559	0.916254	DETECTED	10.75	10.76	10.79	10.42	11.14	11.91	11.03	10.84	11.66	10.64	11.11	11.17
Ptk2	-0.0566667	-1.04006	0.669686	0.916254	DETECTED	13.06	13.04	13.04	13.25	13.03	13.07	13	13.2	13.13	12.5	12.95	13.37
Tlr3	0.106667	1.07674	0.673557	0.916254	DETECTED	9.6	9.71	9.22	9.56	10.28	10.37	10.13	9.76	10.51	9.3	9.88	9.8
Pla2g2a	0.318333	1.24689	0.673588	0.916254	UNDETECTED	3.17	2.91	2.46	0.84	5.43	2.28	2.62	3.01	4.61	1.82	3.86	3.08
C4a	0.181667	1.13419	0.674077	0.916254	DETECTED	12.45	12.45	11.88	10.84	12.66	13.43	12.73	11.91	13.06	12.36	11.78	12.96
Fcamr	-0.295	-1.22688	0.674452	0.916254	UNDETECTED	4.13	6.33	4.44	3.65	6.77	6.24	4.92	4.27	6.16	5.09	5.87	3.48
Icam1	-0.19	-1.14076	0.675541	0.916254	DETECTED	10.18	10.75	10.44	9.56	11.21	11.82	10.91	10.43	11.45	10.41	10.38	9.24
Cd274	0.245	1.18509	0.678182	0.916254	DETECTED	10.88	10.2	10.9	8.54	11.12	12.04	11.38	10.05	11.21	10.63	10.01	11.87
Cd160	0.311667	1.24114	0.679021	0.916254	UNDETECTED	6.01	6.17	4.44	2.51	5.42	5.88	5.9	6.2	6	3.38	6.06	4.76
Xcr1	-0.375	-1.29684	0.683684	0.916254	DETECTED	8.35	7.8	5.78	4.48	8.62	9.6	7.58	7.03	8.41	6.33	5.58	7.45
S100a8	0.396667	1.31646	0.68693	0.916254	DETECTED	9.85	7.55	12.03	8.23	9.44	9.96	9.1	8.6	8.38	11.5	9.21	12.65
Gata3	-0.0883333	-1.06314	0.686952	0.916254	DETECTED	9.21	9.44	9.17	9.34	9.47	9.84	9.13	9.33	9.61	8.54	9.47	9.86
Crlf2	-0.0433333	-1.03049	0.687387	0.916254	DETECTED	12.41	12.27	12.38	12.18	12.34	12.71	12.43	12.31	12.46	12.5	12.33	12
C2	-0.216667	-1.16205	0.687462	0.916254	DETECTED	9.32	9.66	8.88	7.84	10.13	10.98	9.56	9.18	10.39	8.7	9.23	8.45
Abl1	-0.0933333	-1.06683	0.68842	0.916254	DETECTED	11.21	11.03	11.05	11.32	10.97	11.1	11.17	11.12	11.26	10.01	11.02	11.54
Il17re	0.265	1.20164	0.688846	0.916254	UNDETECTED	3.67	3.85	3.75	2.97	2.78	3.01	2.62	1.78	3.67	2.89	5.16	5.5
Cd3eap	0.128333	1.09303	0.690122	0.916254	DETECTED	9.19	9.09	9.42	9.53	9.23	9.01	8.92	9.63	8.81	8.81	9.39	10.68
Tlr8	-0.116667	-1.08423	0.693727	0.91758	DETECTED	11.31	11.66	10.8	10.87	11.43	12.43	11.41	11.24	11.86	11.39	11.17	10.73
Il17f	-0.185	-1.13682	0.694591	0.91758	UNDETECTED	4.9	5.27	4.76	4.88	5.66	4.21	4.92	3	4.92	4.78	4.85	6.1
Ccr9	-0.221667	-1.16608	0.698202	0.91758	DETECTED	8.02	8.8	7.39	7.65	9.34	10.22	8.9	8.67	9.49	7.79	7.95	7.29
Irf8	-0.16	-1.11729	0.698385	0.91758	DETECTED	11.42	11.45	10.99	10.15	12.05	12.4	11.44	11.09	12.2	11.27	11.05	10.45
Irf4	-0.19	-1.14076	0.702073	0.91758	DETECTED	7.15	8.06	6.76	6.2	6.87	8.44	7.52	7.25	8.3	6.14	6.18	6.95
Nfatc2	-0.111667	-1.08048	0.703153	0.91758	DETECTED	9.96	10.29	10.03	9.66	10.22	10.92	10.29	10.07	10.77	9.43	9.41	10.44
Il5	-0.268333	-1.20442	0.704089	0.91758	UNDETECTED	4.13	4.63	2.46	3.33	5.42	5.02	5.21	3.01	4.01	1.84	4.87	4.44
Il22ra2	-0.261667	-1.19886	0.704541	0.91758	UNDETECTED	6.81	5.98	5.05	4.28	6.52	5.46	6.4	3.67	6.01	5.84	6.78	3.83
C8g	0.195	1.14472	0.711282	0.92347	UNDETECTED	6.01	5.77	4.44	5.59	5.42	5.46	6.88	5.07	6.32	5.37	6.39	3.83
Ifnar1	0.035	1.02456	0.712439	0.92347	DETECTED	12.83	12.83	12.68	12.7	12.76	12.97	12.82	12.91	13	12.55	12.65	13.05
H2-Aa	0.27	1.20581	0.714883	0.923596	DETECTED	16.39	15.8	14.99	12.85	16.14	17.37	16.25	15.55	17.08	16.13	15.32	14.83
Defb1	-0.276667	-1.21139	0.715913	0.923596	UNDETECTED	6.93	6.33	5.32	5.97	5.65	4.74	4.92	3.97	3.71	6.21	6.66	7.81
Il7	-0.0716667	-1.05093	0.720508	0.927337	DETECTED	11.2	10.57	10.42	10.77	10.37	10.08	10.7	10.43	10.17	10.27	10.48	10.93
Il1a	-0.226667	-1.17013	0.729911	0.935584	UNDETECTED	7.9	4.63	7.36	7.35	5.42	5.22	6.88	5.51	6.81	6.24	5.11	5.97
Tnf	-0.15	-1.10957	0.730337	0.935584	DETECTED	8.12	8.11	7.86	7.14	7.99	9.63	8.44	7.31	8.73	7.36	7.6	8.51
C1s	0.123333	1.08925	0.735051	0.939423	DETECTED	14.58	14.23	13.89	13.17	14.36	15.12	14.81	14.51	15.08	14.23	13.87	13.59
Il10ra	0.115	1.08298	0.739198	0.942521	DETECTED	11.52	11.72	10.93	10.71	11.95	12.59	11.81	11.3	12.53	11.52	11.51	11.44
C6	-0.141667	-1.10318	0.743506	0.944532	DETECTED	9.6	9.63	8.49	7.93	9.68	10.49	9.67	8.96	9.38	9.17	9.35	8.44
Icam5	-0.128333	-1.09303	0.746683	0.944532	UNDETECTED	5.53	5.98	5.33	5.59	5.42	5.47	5.46	5.89	6.01	3.79	5.13	6.27
Nfkbia	-0.0716667	-1.05093	0.747038	0.944532	DETECTED	11.55	11.23	12.13	10.91	11.47	11.63	11.44	11.38	11.52	11.01	11.16	11.98
Tbx21	0.121667	1.08799	0.749847	0.944532	DETECTED	10.76	10.89	10.56	9.21	11.09	11.64	11.18	10.31	11.1	10.54	10.58	11.17
Cd8b1	-0.266667	-1.20303	0.751056	0.944532	UNDETECTED	7.33	5.53	5.05	3.28	5.65	8.16	6.88	4.27	6.02	5.12	4.83	6.28
Tcf7	-0.148333	-1.10829	0.751136	0.944532	DETECTED	7.78	8.96	7.86	7.06	8.95	9.18	8.34	8.37	9.28	7.62	8.1	7.19
Cd247	0.18	1.13288	0.753265	0.945036	DETECTED	9.18	8.58	8.19	6.46	9.02	9.96	9.23	8.7	9.74	8.22	8.03	8.55
Ncf4	0.07	1.04972	0.755419	0.94557	DETECTED	12.15	12.42	12.12	11.69	12.71	12.99	12.29	12.22	12.86	12.55	12.43	12.15
Csf3r	-0.095	-1.06807	0.758773	0.947471	DETECTED	8.86	8.83	9.02	8.39	9.19	10	9.04	8.45	9.74	9.03	9.11	8.35
Klra6	-0.25	-1.18921	0.760402	0.947471	UNDETECTED	5.23	5.98	1.88	5.8	6.65	7	4.61	4.82	5.83	5.36	5.65	4.77
Ccr10	-0.141667	-1.10318	0.764337	0.95021	UNDETECTED	6.93	7.24	6.19	4.81	7.25	6.51	6.88	5.29	6.81	6.69	5.83	6.58
Ifi204	-0.08	-1.05702	0.771359	0.952512	DETECTED	13.64	13.79	13.58	13.06	14.13	14.41	13.94	13.75	14.43	13.55	13.22	13.24
Cd2	0.156667	1.11471	0.773564	0.952512	DETECTED	9.78	9.9	9.52	8.08	10.51	11.32	10.41	10.03	11.18	9.76	9.38	9.29
Mapk14	-0.05	-1.03526	0.773588	0.952512	DETECTED	11.63	11.56	11.37	11.63	11.65	11.82	11.72	11.65	11.87	10.86	11.41	11.85
Mif	0.1	1.07177	0.774712	0.952512	DETECTED	15.75	14.93	16.07	15.4	15.25	15.2	15.75	15.2	14.59	15.67	15.26	16.73
Clec4a4	0.171667	1.12636	0.774896	0.952512	UNDETECTED	6.01	5.53	3.35	4.87	5.42	6.39	6.09	4.82	4.93	4.15	6.67	5.94
Nfatc1	-0.121667	-1.08799	0.777904	0.952706	DETECTED	9.69	9.66	9.35	9.31	9.54	10.06	9.68	9.68	9.98	7.62	9.48	10.44
Socs1	0.0766667	1.05458	0.778537	0.952706	DETECTED	12	12.11	11.86	11.25	12.54	12.97	12.42	12	12.55	12.27	11.93	12.02
Ccr5	0.0866667	1.06191	0.780669	0.953183	DETECTED	11.88	11.98	11.79	10.87	12.19	12.71	11.89	11.75	12.43	11.91	11.41	12.55
Rorc	0.188333	1.13945	0.783059	0.953972	UNDETECTED	2.59	4.63	4.77	2.54	4.89	4.22	4.27	3.01	5.4	2.9	3.47	5.72
Cd163	-0.0733333	-1.05214	0.785388	0.954683	DETECTED	9.47	10.04	10.84	10.2	10.35	9.99	10.14	10.95	9.81	9.85	10.01	9.69
Tnfsf12	0.035	1.02456	0.789134	0.957109	DETECTED	10.85	10.63	10.54	10.82	10.55	11.01	10.74	10.89	10.96	10.32	10.99	10.71
Pparg	-0.14	-1.10191	0.79437	0.959477	DETECTED	7.5	7.24	5.99	5.51	7.89	7.89	6.97	6.67	7.92	6.3	7.52	5.8
Cd40	0.141667	1.10318	0.796698	0.959477	DETECTED	9.51	9.71	9.58	7.67	10.56	11.16	10.2	9.67	10.69	9.46	9.74	9.28
Irf7	0.101667	1.07301	0.79775	0.959477	DETECTED	12.36	12.91	12.17	11.66	13.19	13.73	12.87	12.62	13.84	12.49	12.65	12.16
Hfe	0.065	1.04608	0.798102	0.959477	DETECTED	11.8	11.98	11.28	11.64	11.92	12.23	11.92	11.98	12.3	12.09	12.08	10.87
Cybb	-0.106667	-1.07674	0.802638	0.960729	DETECTED	13.47	13.68	12.73	12.25	13.81	14.72	13.57	13.08	14.26	13.15	13.21	12.75
Ptprc	-0.103333	-1.07425	0.805515	0.960729	DETECTED	12.72	13.02	12.15	11.61	13.19	13.87	12.9	12.5	13.69	12.18	12	12.67
Stat3	-0.0566667	-1.04006	0.807436	0.960729	DETECTED	13.65	13.35	13.65	12.91	13.68	13.98	13.72	13.52	13.93	12.98	12.96	13.77
Ifih1	-0.0783333	-1.0558	0.809466	0.960729	DETECTED	12.81	13.13	12.59	12.2	13.49	13.88	13.14	12.96	13.77	12.49	12.61	12.66
Klra4	-0.155	-1.11342	0.810971	0.960729	UNDETECTED	4.9	2.35	3.75	2.97	3.58	1.84	4.92	2.64	3.31	1.83	3.48	2.28
Runx3	-0.0983333	-1.07054	0.811427	0.960729	DETECTED	9.58	8.8	8.8	9.1	9.44	10	9.61	9.08	9.9	8.34	8.05	10.15
Card9	-0.0216667	-1.01513	0.811438	0.960729	DETECTED	9.41	9.44	9.32	9.57	9.51	9.31	9.19	9.27	9.39	9.32	9.58	9.68
Ccl5	0.138333	1.10063	0.813937	0.961605	DETECTED	11.54	12.05	11.09	10.63	12.51	13.89	12.7	12.06	13.25	11.87	11.55	11.11
Ccrl1	-0.183333	-1.1355	0.815941	0.961896	UNDETECTED	5.53	6.33	5.58	3.64	6.23	6.23	2.62	6.05	5.43	5.61	7.43	5.3
Cd27	-0.138333	-1.10063	0.819166	0.963058	DETECTED	9.11	8.48	8.1	6.77	9.28	10.25	9.31	8.72	9.63	7.81	7.9	7.79
Cfb	-0.106667	-1.07674	0.820448	0.963058	DETECTED	11.72	12.14	11.29	10.76	12.42	13.03	12.22	11.84	12.94	11.52	11.57	10.63
Cxcr6	0.17	1.12506	0.828106	0.969966	DETECTED	10.83	9.74	8.57	7.18	9.95	12.1	10.61	9.23	10.79	9.76	9.22	9.78
Tnfsf8	-0.0933333	-1.06683	0.835065	0.971969	DETECTED	7.9	7.33	6.75	6.56	8.17	8.6	8.26	7.18	8.2	6.51	7.63	6.97
Cd3e	0.153333	1.11214	0.836381	0.971969	DETECTED	10.49	9.31	9	7.19	10.16	11.66	10.7	9.05	11.09	9.43	9.03	9.43
Il6st	-0.0416667	-1.0293	0.838324	0.971969	DETECTED	12.34	12.23	12.4	12.13	12.32	12.67	12.35	12.54	12.52	11.51	12.14	12.78
Ski	-0.0633333	-1.04488	0.840137	0.971969	DETECTED	11.29	11.58	11.33	11.4	11.52	11.48	11.63	11.66	11.69	10.09	11.01	12.14
Cd55	-0.0733333	-1.05214	0.842102	0.971969	DETECTED	8.66	7.74	7.8	7.34	8.44	9.06	8.69	7.37	8.87	8.16	7.87	7.64
Sell	-0.0783333	-1.0558	0.844961	0.971969	DETECTED	12.77	11.79	12.87	11.53	12.29	12.3	12.53	11.79	12	12.05	11.18	13.53
Ccl11	0.0816667	1.05824	0.845649	0.971969	DETECTED	10.02	11.2	10.67	9.69	11.49	11.98	10.89	10.85	11.82	10.6	10.81	10.57
Klrk1	0.123333	1.08925	0.847931	0.971969	DETECTED	10.46	10.79	9.74	8.43	11.16	12.27	10.97	10.32	11.92	10.71	9.86	9.81
Itln1	0.075	1.05336	0.849289	0.971969	DETECTED	7.33	5.54	5.79	6.62	7.33	7.67	7.31	6.77	6.61	6.59	6.63	6.82
Klra5	-0.111667	-1.08048	0.851043	0.971969	UNDETECTED	6.21	4.63	5.58	3.65	6.06	5.88	6.66	4.55	4.03	6.19	5.14	4.77
Batf	-0.0583333	-1.04126	0.853	0.971969	DETECTED	9.43	9.51	9	9.12	9.8	10.75	9.68	9.68	10.1	9.55	9.36	8.89
Itgal	-0.09	-1.06437	0.858462	0.971969	DETECTED	12.14	11.71	10.95	9.98	11.97	12.82	12.03	11.5	12.55	11.14	10.96	10.85
Cxcl12	-0.08	-1.05702	0.859408	0.971969	DETECTED	12.14	12.1	12.31	11.01	12.77	13.8	12.46	11.87	13.31	12.08	12.15	11.78
Pdcd1lg2	-0.161667	-1.11858	0.859946	0.971969	DETECTED	7.71	6.97	6.87	6.47	6.64	9	9.12	7.11	8.37	5.49	4.13	8.47
Bst1	-0.0483333	-1.03407	0.860438	0.971969	DETECTED	11.59	11.49	11.9	10.87	12	12.52	12.03	11.47	12.04	11.46	11.22	11.86
Slamf7	-0.115	-1.08298	0.860521	0.971969	DETECTED	10.12	10.04	9.55	8.03	10.66	12.24	10.54	9.47	11.16	9.81	9.6	9.37
Myd88	-0.025	-1.01748	0.864152	0.971969	DETECTED	10.93	11.07	11.03	10.74	11.43	11.5	10.97	11	11.46	11	11.03	11.09
Smad5	0.0283333	1.01983	0.864605	0.971969	DETECTED	13.06	13.02	12.96	13.33	12.98	12.98	13.14	13.17	12.99	12.54	12.99	13.67
Itgb2	0.055	1.03886	0.865331	0.971969	DETECTED	12.12	12.05	12.07	11.31	12.59	13.13	12.57	11.94	13.05	12.17	11.72	12.15
Cd46	0.0583333	1.04126	0.866761	0.971969	UNDETECTED	3.67	5.26	4.11	4	4.6	5.01	4.27	5.07	4.63	3.74	5.15	4.14
Hamp	0.121667	1.08799	0.867131	0.971969	UNDETECTED	5.23	3.41	1.9	4.91	4.6	2.27	5.47	3.68	3.31	3.33	4.55	2.71
Ptpn6	0.0483333	1.03407	0.87308	0.974919	DETECTED	12.52	12.82	12.27	12.02	13.07	13.72	12.78	12.57	13.45	12.9	12.68	12.33
Csf2rb	-0.0333333	-1.02337	0.873327	0.974919	DETECTED	11.08	11.22	11.27	10.94	11.61	11.87	11.26	11.13	11.79	10.91	11.02	11.68
Btnl1	-0.106667	-1.07674	0.878501	0.97728	UNDETECTED	4.9	3.41	4.77	2.08	4.89	3.94	3.08	3.98	5.16	1.84	4.55	4.74
Ifna1	-0.11	-1.07923	0.882435	0.97728	UNDETECTED	4.12	2.91	2.46	2.1	2.3	1.84	2.62	3.01	-0.37	3.31	4.22	2.28
Il13ra1	-0.0233333	-1.0163	0.883509	0.97728	DETECTED	11.42	11.27	11.67	10.82	11.28	11.82	11.49	11.28	11.31	11.37	11.17	11.52
Cd8a	-0.121667	-1.08799	0.883552	0.97728	DETECTED	10.28	8.77	8.09	6.42	9.69	11.22	9.97	7.59	10.07	8.94	8.1	9.07
Il10	-0.1	-1.07177	0.884976	0.97728	UNDETECTED	3.68	5.27	4.44	4.6	5.87	5.89	6.78	3	6	3.76	4.85	4.76
Il6ra	0.0433333	1.03049	0.886163	0.97728	DETECTED	11.24	11.22	10.95	10.99	11.31	11.56	11.21	11.12	11.39	10.38	10.99	12.44
Aire	0.0683333	1.0485	0.889133	0.978277	UNDETECTED	4.53	5.53	2.93	3.67	5.17	4.22	3.9	3.98	3.68	5.33	4.55	5.02
Dpp4	-0.0783333	-1.0558	0.891818	0.978277	DETECTED	6.69	7.91	8.02	7.42	8.51	9.74	8.64	6.43	8.76	7.52	7.83	8.64
Il21	-0.0866667	-1.06191	0.892432	0.978277	UNDETECTED	5.52	4.96	7.01	5.6	4.59	3.92	7.07	4.55	4.35	5.82	5.14	4.15
Nfil3	0.025	1.01748	0.900651	0.978975	DETECTED	11.88	11.56	12.2	11.52	11.78	11.75	11.81	11.56	11.52	11.82	11.54	12.59
Ikzf1	0.0466667	1.03288	0.904476	0.978975	DETECTED	9.3	9.28	8.52	8.5	9.35	10.37	9.23	9.13	10.05	8.48	8.77	9.94
Ctsg	-0.05	-1.03526	0.904869	0.978975	DETECTED	7.96	8.4	6.74	7.36	8.44	8.79	8.58	7.98	8.67	7.06	7.48	7.62
Tagap	0.05	1.03526	0.905112	0.978975	DETECTED	8.98	9.08	7.72	7.88	9.5	10.05	9.02	8.81	9.47	8.48	9.2	8.53
Il18r1	-0.0666667	-1.04729	0.907733	0.978975	DETECTED	10.45	10.22	9.38	8.23	10.7	11.65	10.5	9.56	11.22	9.75	9.37	9.83
Kir3dl1	0.0633333	1.04488	0.909073	0.978975	UNDETECTED	5.23	2.92	4.11	4.89	4.6	5.25	4.92	3.98	3.33	4.45	6.25	4.45
Camp	0.0683333	1.0485	0.909325	0.978975	UNDETECTED	4.53	2.91	3.36	1.54	4.28	4.5	4.27	3.35	3.31	2.4	3.47	4.73
Cd7	0.0516667	1.03646	0.909988	0.978975	DETECTED	7.65	8.64	7.74	6.81	8.7	9.21	8.14	8.24	9.35	7.88	8.02	7.43
Itga4	-0.0366667	-1.02574	0.910662	0.978975	DETECTED	10.12	10.53	9.7	9.71	10.5	11.37	10.46	10.07	11.15	10.05	10.02	9.96
Gpr44	0.08	1.05702	0.910966	0.978975	UNDETECTED	1.87	4.96	1.9	3.34	3.2	4.77	2.09	5.31	3.31	2.89	3.47	3.45
Klrd1	0.0633333	1.04488	0.917885	0.983484	DETECTED	11.3	11.06	10.01	8.56	11.21	12.3	11.28	10.3	11.7	10.97	9.85	10.72
Ikbkg	0.0183333	1.01279	0.918757	0.983484	DETECTED	10.53	10.38	10.71	10.82	10.48	10.77	10.75	10.51	10.29	10.32	10.59	11.34
Fasl	0.06	1.04247	0.925988	0.984551	DETECTED	8.47	7.85	7.25	4.99	8.17	9.07	7.76	7.1	8.47	7.14	7.9	7.79
Klrc1	0.0583333	1.04126	0.931116	0.984551	DETECTED	12.17	11.41	10.61	8.86	11.78	12.97	11.86	10.87	12.41	11.56	10.5	10.95
Casp2	0.00833333	1.00579	0.931176	0.984551	DETECTED	11.03	10.95	10.96	11.03	10.91	11.18	11.14	11.08	11.18	10.61	11.07	11.03
Fcgr4	0.055	1.03886	0.931617	0.984551	DETECTED	13.76	13.59	12.95	10.99	14.07	15.06	13.91	13.06	14.42	13.68	12.89	12.79
Ifng	-0.045	-1.03168	0.932096	0.984551	DETECTED	7.15	6.49	6.5	5.06	6.98	8.27	7.39	6.45	7.18	5.69	6.19	7.28
Vcam1	0.0166667	1.01162	0.933438	0.984551	DETECTED	13.93	13.37	13.68	13.24	13.64	13.91	14.03	13.64	13.98	13.2	13.16	13.86
Icos	0.045	1.03168	0.934976	0.984551	DETECTED	9.53	9.13	9.28	7.75	9.78	10.68	10.05	9.09	10.74	8.31	8.66	9.57
Itga2b	-0.0433333	-1.03049	0.936168	0.984551	UNDETECTED	6.01	6.17	4.44	5.36	6.52	5.24	5.69	4.27	5.19	4.82	7.09	6.42
Ikzf4	0.0233333	1.0163	0.9365	0.984551	DETECTED	6.69	7.33	6.18	6.36	7.67	7.31	6.77	6.86	6.62	6.85	6.95	7.63
Muc1	-0.0216667	-1.01513	0.940864	0.984551	DETECTED	8.76	8.48	8.24	8.08	8.64	8.43	8.98	8.6	8.04	7.57	8.05	9.26
Prkcd	0.015	1.01045	0.941069	0.984551	DETECTED	12.56	12.6	12.52	12.09	12.7	13.11	12.73	12.7	13.15	12.13	12.31	12.65
Map4k1	-0.025	-1.01748	0.941354	0.984551	DETECTED	8.67	9.13	8.95	8.03	9.29	9.98	9	8.5	9.71	8.49	8.84	9.36
Klra1	-0.0433333	-1.03049	0.946654	0.986461	UNDETECTED	4.53	2.35	4.45	3.69	1.74	4.5	4.61	4.56	3.31	3.32	2.11	3.09
Thy1	0.0166667	1.01162	0.947027	0.986461	DETECTED	11.54	11.34	11.54	10.81	11.75	12.36	11.55	11.25	12.09	11.43	11.34	11.78
Zbtb7b	-0.0266667	-1.01866	0.948589	0.986461	DETECTED	10.72	10.76	10.69	10.86	10.7	10.98	10.48	10.63	10.47	10.05	10.25	12.67
Cxcl13	0.05	1.03526	0.952824	0.988984	DETECTED	7.58	8.06	7.24	7.22	8.33	9.62	8.88	7.55	10.21	8.34	8.49	4.88
App	-0.005	-1.00347	0.956883	0.990135	DETECTED	14.53	14.51	14.6	14.31	14.55	14.69	14.55	14.61	14.76	14.21	14.5	14.53
Tnfsf15	0.0266667	1.01866	0.957553	0.990135	UNDETECTED	4.13	4.63	4.45	3.67	5.17	5.48	4.92	3.35	5.62	5.79	4.2	3.81
Cd6	-0.03	-1.02101	0.963614	0.99392	DETECTED	8.07	6.97	7.25	6.17	7.6	9.86	8.22	7.17	8.56	5.99	7.62	8.18
Il19	0.0333333	1.02337	0.965203	0.99392	UNDETECTED	4.13	5.53	3.36	5.64	1.74	3.34	3.9	4.28	4.9	3.73	2.11	5.02
Ccr7	0.02	1.01396	0.967124	0.99392	DETECTED	8.18	9.13	9.06	8.25	10.03	10.49	9.67	9.19	10.27	8.86	8.99	8.28
Ube2l3	0.00333333	1.00231	0.968482	0.99392	DETECTED	13.02	13.16	13.09	13.26	13.27	13.3	13.12	13.2	13.22	12.96	13.15	13.47
Lair1	-0.0116667	-1.00812	0.976501	0.997214	DETECTED	10.83	10.88	9.87	9.31	10.93	11.6	10.88	10.28	11.26	10.47	10.43	10.03
Cd9	-0.005	-1.00347	0.979001	0.997214	DETECTED	15.83	15.42	15.78	15.87	15.63	15.44	15.63	15.77	15.53	16.18	15.86	14.97
Bax	-0.00166667	-1.00116	0.980093	0.997214	DETECTED	12.83	12.72	12.89	13.04	12.94	12.93	12.8	12.83	12.75	13.03	13.02	12.91
Pdcd1	-0.0183333	-1.01279	0.980959	0.997214	DETECTED	10.32	8.55	8.18	7.18	9.7	11.16	9.75	7.69	9.97	9.63	7.87	10.07
C8a	-0.015	-1.01045	0.981555	0.997214	UNDETECTED	4.53	2.35	1.9	4.02	5.42	4.23	4.27	3.35	4.32	2.41	4.21	3.8
Il22	-0.0166667	-1.01162	0.982944	0.997214	UNDETECTED	2.59	-0.57	2.94	2.57	1.02	2.28	2.09	-0.57	2.5	2.87	2.63	1.21
Ifngr1	0.00333333	1.00231	0.984452	0.997214	DETECTED	13.29	13.28	12.97	13.06	13.43	13.58	13.34	13.42	13.72	13.19	13.27	12.69
Mbl2	-0.00666667	-1.00463	0.988239	0.998537	UNDETECTED	3.17	2.91	3.36	4.03	2.3	3.95	3.51	4.28	2.51	2.88	4.22	2.28
Trem2	0.00166667	1.00116	0.992111	0.998537	DETECTED	10.28	10.39	10.15	10.14	10.37	10.81	10.15	9.91	10.53	10.67	10.69	10.2
Cd226	0.005	1.00347	0.992505	0.998537	DETECTED	9.85	9.91	8.9	8.23	10.09	11.34	10.27	9.55	10.78	9.59	8.99	9.17
Notch2	0.00166667	1.00116	0.993832	0.998537	DETECTED	12.12	12.1	11.96	12.2	12.12	12.31	12.26	12.37	12.45	11.31	11.8	12.63
Ifnb1	-0.00333333	-1.00231	0.995622	0.998537	UNDETECTED	4.9	6.17	5.33	5.38	4.89	3.63	5.46	5.71	4.92	5.59	5.87	2.73
Cd22	0.00166667	1.00116	0.996712	0.998537	DETECTED	7.57	7.8	6.33	6.68	7.4	8.72	7.86	7.18	7.13	7.01	8.1	7.23
Ltb	0	-1	1	1	DETECTED	10.37	10.5	9.62	9.47	10.88	11.73	10.55	10.39	11.51	10.5	9.93	9.69

## Sheet: S2_qRTPCR gene list
Table S2. Target genes selected for qRT-PCR analysis.
Mouse Gene Symbol	Gene Name	TaqMan Assay ID
Il1b	interleukin 1 beta	Mm00434228_m1
Ccl12	chemokine (C-C motif) ligand 12	Mm01617100_m1
Ptgs2	prostaglandin-endoperoxide synthase 2	Mm00478374_m1
Ccl24	chemokine (C-C motif) ligand 24	Mm00444701_m1
Csf2	colony stimulating factor 2 (granulocyte-macrophage)	Mm01290062_m1
Cd247	CD247 antigen	Mm00446171_m1
Cd3e	CD3 antigen, epsilon polypeptide	Mm00599684_g1
Cd8b1	CD8 antigen, beta chain 1	Mm00438116_m1
Cxcl11	chemokine (C-X-C motif) ligand 11	Mm00444662_m1
Cxcr6	chemokine (C-X-C motif) receptor 6	Mm02620517_s1
Gzma	granzyme A	Mm01304452_m1
Gzmb	granzyme B	Mm00442834_m1
Lck	lymphocyte protein tyrosine kinase	Mm00802897_m1
Mrc1	mannose receptor, C type 1	Mm00485148_m1
Prf1	perforin 1 (pore forming protein)	Mm00812512_m1
Tnfrsf17	tumor necrosis factor receptor superfamily, member 17	Mm00495683_m1
Ifng	interferon gamma	Mm01168134_m1
Arg1	arginase, liver	Mm00475988_m1
Casp1	caspase 1	Mm00438023_m1
Ccl2	chemokine (C-C motif) ligand 2	Mm00441242_m1
Ccl5	chemokine (C-C motif) ligand 5	Mm01302427_m1
Ccl7	chemokine (C-C motif) ligand 7	Mm00443113_m1
Ccr5	chemokine (C-C motif) receptor 5	Mm01963251_s1
Ccr6	chemokine (C-C motif) receptor 6	Mm99999114_s1
Ccr7	chemokine (C-C motif) receptor 7	Mm01301785_m1
Cd244	CD244 natural killer cell receptor 2B4	Mm00479575_m1
Cd274	CD274 antigen	Mm00452054_m1
Cd28	CD28 antigen	Mm00483137_m1
Cd4	CD4 antigen	Mm00442754_m1
Cd40	CD40 antigen	Mm00441891_m1
Cd40lg	CD40 ligand	Mm00441911_m1
Cd86	CD86 antigen	Mm00444543_m1
Ctla4	cytotoxic T-lymphocyte-associated protein 4	Mm00486849_m1
Cxcl10	chemokine (C-X-C motif) ligand 10	Mm00445235_m1
Cxcl9	chemokine (C-X-C motif) ligand 9	Mm00434946_m1
Cxcr3	chemokine (C-X-C motif) receptor 3	Mm99999054_s1
Entpd1	ectonucleoside triphosphate diphosphohydrolase 1	Mm00515447_m1
Fas	Fas (TNF receptor superfamily member 6)	Mm01204974_m1
Fasl	Fas ligand (TNF superfamily, member 6)	Mm00438864_m1
Foxo1	forkhead box O1	Mm00490672_m1
Foxp3	forkhead box P3	Mm00475162_m1
Gata3	GATA binding protein 3	Mm00484683_m1
H2-Aa	histocompatibility 2, class II antigen A, alpha	Mm00439211_m1
H2-D1	histocompatibility 2, D region locus 1	Mm00833934_g1
H2-Eb1	histocompatibility 2, class II antigen E beta	Mm00439221_m1
H2-K1	histocompatibility 2, K1, K region	Mm01612247_mH
Icam1	intercellular adhesion molecule 1	Mm00516023_m1
Icos	inducible T cell co-stimulator	Mm00497600_m1
Ido1	indoleamine 2,3-dioxygenase 1	Mm00492586_m1
Ifnb1	interferon beta 1, fibroblast	Mm00439552_s1
Ifngr1	interferon gamma receptor 1	Mm00599890_m1
Il10	interleukin 10	Mm00439614_m1
Il12b	interleukin 12b	Mm00434174_m1
Il13	interleukin 13	Mm00434204_m1
Il15	interleukin 15	Mm00434210_m1
Il17a	interleukin 17A	Mm00439618_m1
Il1a	interleukin 1 alpha	Mm00439620_m1
Il2	interleukin 2	Mm00434256_m1
Il21	interleukin 21	Mm00517640_m1
Il4	interleukin 4	Mm00445259_m1
Il6	interleukin 6	Mm00446190_m1
Il7r	interleukin 7 receptor	Mm00434295_m1
Irf1	interferon regulatory factor 1	Mm01288580_m1
Irf3	interferon regulatory factor 3	Mm00516784_m1
Klrd1	killer cell lectin-like receptor, subfamily D, member 1	Mm00495182_m1
Klrg1	killer cell lectin-like receptor subfamily G, member 1	Mm00516879_m1
Nlrp3	NLR family, pyrin domain containing 3	Mm00840904_m1
Nt5e	5' nucleotidase, ecto	Mm00501910_m1
Pdcd1	programmed cell death 1	Mm01285676_m1
Psmb8	proteasome (prosome, macropain) subunit, beta type 8 (large multifunctional peptidase 7)	Mm01278979_m1
Psmb9	proteasome (prosome, macropain) subunit, beta type 9 (large multifunctional peptidase 2)	Mm00479004_m1
Rae1	RAE1 RNA export 1 homolog (S. pombe)	Mm00558293_g1
Rorc	RAR-related orphan receptor gamma	Mm01261022_m1
S100a8	S100 calcium binding protein A8 (calgranulin A)	Mm00496696_g1
S100a9	S100 calcium binding protein A9 (calgranulin B)	Mm00656925_m1
Sell	selectin, lymphocyte	Mm00441291_m1
Socs1	suppressor of cytokine signaling 1	Mm00782550_s1
Stat1	signal transducer and activator of transcription 1	Mm00439531_m1
Stat2	signal transducer and activator of transcription 2	Mm00490880_m1
Stat3	signal transducer and activator of transcription 3	Mm01219775_m1
Stat4	signal transducer and activator of transcription 4	Mm00448890_m1
Stat6	signal transducer and activator of transcription 6	Mm01160477_m1
Tap1	transporter 1, ATP-binding cassette, sub-family B (MDR/TAP)	Mm00443188_m1
Tbx21	T-box 21	Mm00450960_m1
Tgfb1	transforming growth factor, beta 1	Mm01178820_m1
Tlr4	toll-like receptor 4	Mm00445273_m1
Tlr7	toll-like receptor 7	Mm00446590_m1
Tnf	tumor necrosis factor	Mm00443258_m1
Tnfrsf18	tumor necrosis factor receptor superfamily, member 18	Mm00437136_m1
Tnfrsf4	tumor necrosis factor receptor superfamily, member 4	Mm00442037_g1
Tnfrsf9	tumor necrosis factor receptor superfamily, member 9	Mm00441899_m1
Tnfsf10	tumor necrosis factor (ligand) superfamily, member 10	Mm01283606_m1
18S	Eukaryotic 18S rRNA	Hs99999901_s1
Actb	actin, beta	Mm00607939_s1
Gusb	glucuronidase, beta	Mm01197698_m1
Hprt	hypoxanthine guanine phosphoribosyl transferase	Mm00446968_m1

## Sheet: S3_RTPCR
Table S3. Relative tumor gene expression levels post-treatment versus control after 1 day.
	P value, vs. Control_Day 1			Mean Fold Change, vs. Control_Day 1
Gene	Anti-CTLA4_Day 1	Selumetinib_Day 1	Anti-CTLA4 + Selumetinib_Day 1	Anti-CTLA4_Day 1	Selumetinib_Day 1	Anti-CTLA4 + Selumetinib_Day 1
Ifnb1	0.002	0.201	0.319	2.328	1.437	1.465
Tnf	0.031	0.273	0.364	2.108	1.255	1.222
Tnfsf10	0.029	0.024	0.078	1.821	1.701	1.65
Ccl7	0.035	0.129	0.118	1.683	0.771	0.7
Irf1	0.034	0.119	0.274	1.614	1.375	1.309
Stat2	0.031	0.026	0.163	1.55	1.495	1.382
Fas	0.169	0.215	0.047	1.463	1.329	1.558
Ptgs2	0.438	0.003	0.003	1.15	0.459	0.456
Tbx21	0.164	0.029	0.105	1.415	1.581	1.441

## Sheet: S4_RTPCR
Table S4. Relative tumor gene expression levels post-treatment versus control after 8 day.
	P value, vs. Control_Day 8			Mean Fold Change, vs. Control_Day 7
Gene	Anti-CTLA4_Day 8	Selumetinib_Day 8	Anti-CTLA4 + Selumetinib_Day 8	Anti-CTLA4_Day 8	Selumetinib_Day 8	Anti-CTLA4 + Selumetinib_Day 8
Arg1	0.001	0.005	0.059	4.978	0.149	1.574
Ccl5	0.021	0.445	0.077	4.483	1.322	4.904
Csf2	0.027	0.522	0.043	3.967	1.121	1.848
Cd274	0.005	0.004	0.045	3.021	0.686	1.777
Icos	0.03	0.621	0.139	2.635	1.069	2.283
Ifng	0.015	0.403	0.072	2.595	0.83	2.594
Cd28	0.046	0.917	0.137	2.287	1.018	2.352
Gzmb	0.005	0.012	0.002	2.219	0.525	2.009
Cd247	0.037	0.673	0.136	2.21	1.095	3.077
Nlrp3	0.02	0.056	0.426	2.129	0.683	1.129
Klrg1	0.021	0.811	0.067	2.084	1.007	1.736
Cd3e	0.046	0.932	0.081	2.047	1.025	2.764
Prf1	0.006	0.039	0.076	2.047	0.516	1.559
cd40	0.039	0.639	0.08	2.022	1.062	1.844
Fas	0.011	0.477	0.166	1.92	0.94	1.573
Ptgs2	0.015	0.004	0.03	1.907	0.269	0.45
Icam1	0.046	0.815	0.184	1.902	0.988	1.66
Klrd1	0.024	0.48	0.059	1.884	0.872	2.201
Pdcd1	0.016	0.195	0.091	1.865	0.737	1.745
Tbx21	0.019	0.661	0.095	1.793	1.064	2.122
Ido1	0.031	0.2	0.203	1.734	0.54	1.149
Irf1	0.001	0.166	0.092	1.73	0.846	1.456
Fasl	0.044	0.467	0.082	1.713	0.889	1.797
Entpd1	0.024	0.769	0.208	1.575	0.96	1.377
Cxcl10	0.048	0.411	0.106	1.57	1.219	1.983
Stat1	0.012	0.591	0.068	1.503	1.077	1.556
Tnfsf10	0.326	0.176	0.047	1.199	1.284	1.99
Stat3	0.257	0.394	0.033	1.179	1.13	1.611
Sell	0.902	0.013	0.026	1.03	0.503	0.588
Il6	0.887	0.007	0.011	0.955	0.477	0.513
Il1b	0.568	0	0	0.839	0.259	0.347
Il12b	0.671	0.039	0.112	1.224	2.395	2.091
Ccr6	0.19	0.007	0.269	1.537	2.336	1.766
Ccr7	0.236	0.032	0.21	1.396	1.887	1.954
Cxcr3	0.174	0.028	0.274	2.019	1.802	2.586
Nt5e	0.18	0.002	0.278	1.131	0.664	0.837
Ccl12	0.091	0.014	0.054	0.785	0.654	0.576
S100a9	0.228	0.04	0.857	1.724	0.456	0.639
Ccl2	0.432	0.027	0.855	1.254	0.442	0.917
S100a8	0.066	0.043	0.438	3.399	0.434	1.285
Tnfrsf9	0.024	0	0.679	1.499	0.433	0.791
Il1a	0.053	0.015	0.187	3.078	0.397	1.628

## Sheet: S5_RtPCR
Table S5A: Effect of combination treatment on transcript levels versus anti-CTLA4 (Day 1 post-treatment)
	qPCR
Gene	P value, vs. Anti-CTLA-4_Day 1	Mean Fold Change, vs. Anti-CTLA-4_Day 1
	Anti-CTLA4 + Selumetinib_Day 1	Anti-CTLA4 + Selumetinib_Day 1
Ccl12	0.001	0.475
Ccl2	0.048	0.451
Ccl7	0.009	0.416
Ptgs2	0.012	0.396
Table S5B: Effect of combination treatment on transcript levels versus anti-CTLA4 (Day 8 post-treatment)
	qPCR
Gene	P value, vs. Anti-CTLA-4_Day 8	Mean Fold Change, vs. Anti-CTLA-4_Day 8
	Anti-CTLA4 + Selumetinib_Day 8	Anti-CTLA4 + Selumetinib_Day 8
Ccl7	0.016	0.605
Sell	0.011	0.571
Il6	0.029	0.537
Nlrp3	0.034	0.531
Il1b	0.016	0.413
Arg1	0.002	0.316
Ptgs2	0.002	0.236
